# Supplementary material
Source: publisher site journal article supplement (https://www.spandidos-publications.com/2277/downloadSupplementary)
Supplement: Supplementary file 1 [file downloadSupplementary]

## Sheet: list of miRNA and targeted gene
Table SIII. Target genes of microRNAs from the primary Sjögren syndrome activation group predicted by TargetScan and miRanda.
miRNA	Gene symbol
hsa-miR-181a-5p	AAK1
hsa-miR-361-5p	AAK1
hsa-miR-1273g-3p	AAK1
hsa-miR-5787	AAK1
hsa-miR-3609	AAK1
hsa-miR-6779-5p	AAK1
hsa-miR-4505	AAK1
hsa-miR-155-5p	AAK1
hsa-miR-3620-5p	AAK1
hsa-miR-98-5p	AASS
hsa-miR-15a-5p	AATK
hsa-miR-7150	AATK
hsa-miR-3609	ABAT
hsa-miR-5096	ABCA4
hsa-miR-98-5p	ABCB9
hsa-miR-98-5p	ABCC10
hsa-miR-98-5p	ABCC5
hsa-miR-3620-5p	ABCF2
hsa-miR-5787	ABCG4
hsa-miR-4505	ABCG4
hsa-miR-1273g-3p	ABCG8
hsa-miR-4492	ABHD14B
hsa-miR-140-3p	ABHD15
hsa-miR-140-3p	ABHD2
hsa-miR-3609	ABHD2
hsa-miR-6779-5p	ABHD2
hsa-miR-6779-5p	ABHD4
hsa-miR-181a-5p	ABI1
hsa-miR-181c-5p	ABI1
hsa-miR-15a-5p	ABI2
hsa-miR-15a-5p	ABL2
hsa-miR-98-5p	ABL2
hsa-miR-148a-3p	ABL2
hsa-miR-181c-5p	ABL2
hsa-miR-30c-1-3p	ABL2
hsa-miR-5787	ABLIM3
hsa-miR-4492	ABR
hsa-miR-15a-5p	ABTB2
hsa-miR-15a-5p	ACACA
hsa-miR-5096	ACAP2
hsa-miR-5787	ACCN2
hsa-miR-6791-5p	ACCN2
hsa-miR-7641	ACCN2
hsa-miR-98-5p	ACER2
hsa-miR-5787	ACP2
hsa-miR-5787	ACRBP
hsa-miR-4505	ACRBP
hsa-miR-181a-5p	ACSL1
hsa-miR-181c-5p	ACSL1
hsa-miR-15a-5p	ACSL4
hsa-miR-98-5p	ACSL6
hsa-miR-98-5p	ACTA1
hsa-miR-30d-5p	ACVR1
hsa-miR-22-3p	ACVR1B
hsa-miR-4505	ACVR1B
hsa-miR-3620-5p	ACVR1B
hsa-miR-4492	ACVR1B
hsa-miR-101-3p	ACVR1C
hsa-miR-181a-5p	ACVR2A
hsa-miR-15a-5p	ACVR2A
hsa-miR-181a-5p	ACVR2B
hsa-miR-22-3p	ACVR2B
hsa-miR-101-3p	ACVR2B
hsa-miR-194-5p	ACVR2B
hsa-miR-140-3p	ACVR2B
hsa-miR-98-5p	ACVR2B
hsa-miR-148b-3p	ACVR2B
hsa-miR-1273g-3p	ACVRL1
hsa-miR-5787	ACVRL1
hsa-miR-6791-5p	ACVRL1
hsa-miR-4505	ACVRL1
hsa-miR-3620-5p	ACVRL1
hsa-miR-4492	ACVRL1
hsa-miR-181a-5p	ADAM11
hsa-miR-22-3p	ADAM11
hsa-miR-181c-5p	ADAM11
hsa-miR-30e-5p	ADAM12
hsa-miR-140-3p	ADAM17
hsa-miR-6791-5p	ADAM19
hsa-miR-6791-5p	ADAMTS10
hsa-miR-15a-5p	ADAMTS18
hsa-miR-148b-3p	ADAMTS18
hsa-miR-7150	ADAMTS19
hsa-miR-6126	ADAMTS4
hsa-miR-3609	ADAMTS5
hsa-miR-30e-5p	ADAMTS6
hsa-miR-1246	ADAMTS6
hsa-miR-550a-5p	ADAMTS6
hsa-miR-98-5p	ADAMTS8
hsa-miR-6779-5p	ADAMTSL1
hsa-miR-22-3p	ADCK2
hsa-miR-5096	ADCY1
hsa-miR-550a-5p	ADCY1
hsa-miR-361-5p	ADCY2
hsa-miR-148b-3p	ADCY2
hsa-miR-148a-3p	ADCY2
hsa-miR-15a-5p	ADCY5
hsa-miR-22-3p	ADCY6
hsa-miR-5787	ADCY6
hsa-miR-101-3p	ADCY6
hsa-miR-31-5p	ADCY6
hsa-miR-6779-5p	ADCY6
hsa-miR-4505	ADCY6
hsa-miR-181a-5p	ADCY9
hsa-miR-4484	ADCYAP1
hsa-miR-15a-5p	ADNP2
hsa-miR-550a-5p	ADPRH
hsa-miR-30e-5p	ADRA1D
hsa-miR-181a-5p	ADRBK1
hsa-miR-5787	ADRBK1
hsa-miR-4505	ADRBK1
hsa-miR-181c-5p	ADRBK1
hsa-miR-4484	ADRBK1
hsa-miR-181a-5p	ADRBK2
hsa-miR-98-5p	ADRBK2
hsa-miR-181c-5p	ADRBK2
hsa-miR-15a-5p	AEBP2
hsa-miR-194-5p	AFF1
hsa-miR-30e-5p	AFF3
hsa-miR-5787	AFF3
hsa-miR-30d-5p	AFF3
hsa-miR-4505	AFF3
hsa-miR-15a-5p	AFF4
hsa-miR-181c-5p	AFTPH
hsa-miR-5787	AGAP2
hsa-miR-423-5p	AGAP2
hsa-miR-4447	AGAP2
hsa-miR-1275	AGAP2
hsa-miR-4472	AGAP2
hsa-miR-4505	AGAP2
hsa-miR-15a-5p	AGAP3
hsa-miR-6803-5p	AGAP3
hsa-miR-423-5p	AGAP3
hsa-miR-6791-5p	AGAP3
hsa-miR-22-3p	AGBL5
hsa-miR-101-3p	AGFG1
hsa-miR-15a-5p	AGFG2
hsa-miR-4687-3p	AGFG2
hsa-miR-6791-5p	AGFG2
hsa-miR-4301	AGPAT4
hsa-miR-15a-5p	AGPAT6
hsa-miR-98-5p	AHCTF1
hsa-miR-550a-5p	AHCTF1
hsa-miR-15a-5p	AHCYL2
hsa-miR-140-3p	AHCYL2
hsa-miR-6779-5p	AHDC1
hsa-miR-5787	AK1
hsa-miR-31-5p	AK2
hsa-miR-148b-3p	AKAP1
hsa-miR-148a-3p	AKAP1
hsa-miR-15a-5p	AKAP11
hsa-miR-3609	AKAP11
hsa-miR-30c-1-3p	AKAP11
hsa-miR-15a-5p	AKAP12
hsa-miR-3609	AKAP13
hsa-miR-98-5p	AKAP5
hsa-miR-7150	AKAP5
hsa-miR-181a-5p	AKAP6
hsa-miR-6779-5p	AKAP6
hsa-miR-30c-1-3p	AKAP6
hsa-miR-194-5p	AKT2
hsa-miR-98-5p	AKT2
hsa-miR-15a-5p	AKT3
hsa-miR-148b-3p	ALCAM
hsa-miR-148a-3p	ALCAM
hsa-miR-140-3p	ALDH1A3
hsa-miR-361-5p	ALDH1L2
hsa-miR-7150	ALDH7A1
hsa-miR-30e-5p	ALG9
hsa-miR-361-5p	ALG9
hsa-miR-30d-5p	ALG9
hsa-miR-4492	ALKBH7
hsa-miR-5787	ALPK3
hsa-miR-98-5p	ALPK3
hsa-miR-4505	ALPK3
hsa-miR-5787	ALX4
hsa-miR-22-3p	AMMECR1L
hsa-miR-15a-5p	AMMECR1L
hsa-miR-98-5p	AMMECR1L
hsa-miR-98-5p	AMOT
hsa-miR-1275	AMOTL1
hsa-miR-7150	AMOTL2
hsa-miR-425-5p	AMPH
hsa-miR-15a-5p	ANGEL1
hsa-miR-5787	ANGEL1
hsa-miR-6791-5p	ANGEL1
hsa-miR-4505	ANGEL1
hsa-miR-22-3p	ANGEL2
hsa-miR-3609	ANGEL2
hsa-miR-30c-1-3p	ANK1
hsa-miR-148a-3p	ANK2
hsa-miR-101-3p	ANK3
hsa-miR-5096	ANKFY1
hsa-miR-194-5p	ANKFY1
hsa-miR-1246	ANKFY1
hsa-miR-15a-5p	ANKIB1
hsa-miR-101-3p	ANKRD11
hsa-miR-5787	ANKRD13B
hsa-miR-140-3p	ANKRD13B
hsa-miR-4447	ANKRD13B
hsa-miR-4505	ANKRD13B
hsa-miR-4492	ANKRD13B
hsa-miR-550a-5p	ANKRD13B
hsa-miR-101-3p	ANKRD17
hsa-miR-98-5p	ANKRD28
hsa-miR-3609	ANKRD28
hsa-miR-4447	ANKRD34A
hsa-miR-4472	ANKRD34A
hsa-miR-1273g-3p	ANKRD40
hsa-miR-6803-5p	ANKRD40
hsa-miR-98-5p	ANKRD46
hsa-miR-98-5p	ANKRD49
hsa-miR-6791-5p	ANKRD5
hsa-miR-22-3p	ANKRD52
hsa-miR-5787	ANKRD52
hsa-miR-6803-5p	ANKRD52
hsa-miR-148b-3p	ANKRD52
hsa-miR-6791-5p	ANKRD52
hsa-miR-6779-5p	ANKRD52
hsa-miR-4505	ANKRD52
hsa-miR-3620-5p	ANKRD52
hsa-miR-15a-5p	ANKS1A
hsa-miR-15a-5p	ANO3
hsa-miR-30e-5p	ANO4
hsa-miR-3609	ANO6
hsa-miR-155-5p	ANTXR1
hsa-miR-30c-1-3p	ANTXR1
hsa-miR-3609	AP1S2
hsa-miR-101-3p	AP3S1
hsa-miR-30c-1-3p	AP3S2
hsa-miR-148b-3p	AP4E1
hsa-miR-148a-3p	AP4E1
hsa-miR-181a-5p	APBA1
hsa-miR-30e-5p	APBA1
hsa-miR-5096	APBA1
hsa-miR-98-5p	APBA1
hsa-miR-3620-5p	APBA2
hsa-miR-22-3p	APBB2
hsa-miR-1273g-3p	APBB2
hsa-miR-31-5p	APBB2
hsa-miR-15a-5p	APLN
hsa-miR-4505	APLN
hsa-miR-140-3p	APLP2
hsa-miR-30c-1-3p	APOBEC2
hsa-miR-4492	APOOL
hsa-miR-194-5p	APPBP2
hsa-miR-5096	APPL1
hsa-miR-3620-5p	AQP1
hsa-miR-15a-5p	AQP11
hsa-miR-3609	AQP4
hsa-miR-7150	ARC
hsa-miR-361-5p	ARCN1
hsa-miR-148b-3p	ARF4
hsa-miR-148a-3p	ARF4
hsa-miR-1275	ARFGAP2
hsa-miR-22-3p	ARFIP2
hsa-miR-6791-5p	ARFIP2
hsa-miR-3620-5p	ARFIP2
hsa-miR-4492	ARFIP2
hsa-miR-361-5p	ARGLU1
hsa-miR-140-3p	ARHGAP17
hsa-miR-15a-5p	ARHGAP26
hsa-miR-5787	ARHGAP26
hsa-miR-98-5p	ARHGAP28
hsa-miR-15a-5p	ARHGAP5
hsa-miR-15a-5p	ARHGDIA
hsa-miR-5787	ARHGDIA
hsa-miR-4505	ARHGDIA
hsa-miR-22-3p	ARHGEF12
hsa-miR-6073	ARHGEF12
hsa-miR-98-5p	ARHGEF15
hsa-miR-148b-3p	ARHGEF17
hsa-miR-31-5p	ARHGEF2
hsa-miR-6791-5p	ARHGEF2
hsa-miR-101-3p	ARHGEF3
hsa-miR-5787	ARHGEF4
hsa-miR-6779-5p	ARHGEF4
hsa-miR-30d-5p	ARHGEF6
hsa-miR-30e-5p	ARID1A
hsa-miR-101-3p	ARID1A
hsa-miR-31-5p	ARID1A
hsa-miR-1275	ARID1A
hsa-miR-140-3p	ARID1B
hsa-miR-194-5p	ARID2
hsa-miR-140-3p	ARID2
hsa-miR-6779-5p	ARID2
hsa-miR-6803-5p	ARID3B
hsa-miR-98-5p	ARID3B
hsa-miR-6791-5p	ARID3B
hsa-miR-4687-3p	ARIH2
hsa-miR-30e-5p	ARL10
hsa-miR-15a-5p	ARL10
hsa-miR-30d-5p	ARL10
hsa-miR-15a-5p	ARL2
hsa-miR-30d-5p	ARL4A
hsa-miR-98-5p	ARL4D
hsa-miR-181a-5p	ARL5A
hsa-miR-181c-5p	ARL5A
hsa-miR-148b-3p	ARL6IP1
hsa-miR-148a-3p	ARL6IP1
hsa-miR-1273g-3p	ARL6IP5
hsa-miR-3609	ARL6IP5
hsa-miR-5787	ARL8A
hsa-miR-6791-5p	ARL8A
hsa-miR-4505	ARL8A
hsa-miR-148a-3p	ARL8B
hsa-miR-361-5p	ARMC8
hsa-miR-140-3p	ARMCX6
hsa-miR-4505	ARNT
hsa-miR-181a-5p	ARNT2
hsa-miR-181c-5p	ARNT2
hsa-miR-22-3p	ARPC5
hsa-miR-15a-5p	ARPP19
hsa-miR-148a-3p	ARPP19
hsa-miR-5787	ARRB2
hsa-miR-4505	ARRB2
hsa-miR-148b-3p	ARRDC3
hsa-miR-148a-3p	ARRDC3
hsa-miR-15a-5p	ARRDC4
hsa-miR-3609	ASAH1
hsa-miR-101-3p	ASAP1
hsa-miR-194-5p	ASAP1
hsa-miR-5096	ASB11
hsa-miR-30e-5p	ASB3
hsa-miR-22-3p	ASB6
hsa-miR-4472	ASB6
hsa-miR-140-3p	ASPH
hsa-miR-155-5p	ASTN1
hsa-miR-30e-5p	ATAD2B
hsa-miR-30d-5p	ATF1
hsa-miR-5787	ATF7
hsa-miR-194-5p	ATF7
hsa-miR-6779-5p	ATF7
hsa-miR-4505	ATF7
hsa-miR-4492	ATF7
hsa-miR-3609	ATG2B
hsa-miR-101-3p	ATG4D
hsa-miR-148b-3p	ATG4D
hsa-miR-148a-3p	ATG4D
hsa-miR-15a-5p	ATG9A
hsa-miR-5787	ATG9A
hsa-miR-4505	ATG9A
hsa-miR-4492	ATG9A
hsa-miR-7150	ATG9A
hsa-miR-140-3p	ATL2
hsa-miR-3609	ATL3
hsa-miR-5787	ATOH8
hsa-miR-4505	ATOH8
hsa-miR-148b-3p	ATP11A
hsa-miR-148a-3p	ATP11A
hsa-miR-181c-5p	ATP11C
hsa-miR-4447	ATP1B2
hsa-miR-6126	ATP1B2
hsa-miR-30c-1-3p	ATP1B2
hsa-miR-5096	ATP1B4
hsa-miR-15a-5p	ATP1B4
hsa-miR-6779-5p	ATP1B4
hsa-miR-30d-5p	ATP2A2
hsa-miR-98-5p	ATP2A2
hsa-miR-181a-5p	ATP2B1
hsa-miR-15a-5p	ATP2B2
hsa-miR-6073	ATP2B2
hsa-miR-15a-5p	ATP2B3
hsa-miR-4687-3p	ATP2B4
hsa-miR-148b-3p	ATP2B4
hsa-miR-148a-3p	ATP2B4
hsa-miR-101-3p	ATP2C1
hsa-miR-15a-5p	ATP6V1B2
hsa-miR-6779-5p	ATP6V1C1
hsa-miR-155-5p	ATP6V1G1
hsa-miR-148b-3p	ATP7A
hsa-miR-181a-5p	ATP8A1
hsa-miR-31-5p	ATP8A1
hsa-miR-148b-3p	ATP8A1
hsa-miR-148a-3p	ATP8A1
hsa-miR-181c-5p	ATP8A1
hsa-miR-181a-5p	ATP8B1
hsa-miR-181c-5p	ATP8B1
hsa-miR-423-5p	ATP8B2
hsa-miR-98-5p	ATP8B4
hsa-miR-7150	ATP9A
hsa-miR-361-5p	ATPAF1
hsa-miR-98-5p	ATPAF1
hsa-miR-3609	ATPBD4
hsa-miR-30d-5p	ATRN
hsa-miR-4687-3p	ATRNL1
hsa-miR-181c-5p	ATRNL1
hsa-miR-101-3p	ATRX
hsa-miR-181a-5p	ATXN1
hsa-miR-101-3p	ATXN1
hsa-miR-3609	ATXN1
hsa-miR-181c-5p	ATXN1
hsa-miR-1273g-3p	ATXN2
hsa-miR-6779-5p	ATXN2L
hsa-miR-181a-5p	ATXN3
hsa-miR-181c-5p	ATXN3
hsa-miR-181a-5p	ATXN7
hsa-miR-181c-5p	ATXN7
hsa-miR-15a-5p	ATXN7L2
hsa-miR-423-5p	ATXN7L3
hsa-miR-140-3p	ATXN7L3
hsa-miR-6791-5p	ATXN7L3
hsa-miR-98-5p	AVEN
hsa-miR-7150	AXIN1
hsa-miR-15a-5p	AXIN2
hsa-miR-98-5p	B3GNT7
hsa-miR-7150	B4GALNT1
hsa-miR-15a-5p	B4GALT1
hsa-miR-6791-5p	B4GALT2
hsa-miR-30e-5p	B4GALT6
hsa-miR-30d-5p	B4GALT6
hsa-miR-148b-3p	B4GALT6
hsa-miR-148a-3p	B4GALT6
hsa-miR-15a-5p	BACE1
hsa-miR-140-3p	BACE1
hsa-miR-4301	BACE1
hsa-miR-98-5p	BACH1
hsa-miR-155-5p	BACH1
hsa-miR-31-5p	BACH2
hsa-miR-6791-5p	BAHCC1
hsa-miR-30c-1-3p	BAHCC1
hsa-miR-140-3p	BAHD1
hsa-miR-7150	BAHD1
hsa-miR-5787	BAI2
hsa-miR-4505	BAI2
hsa-miR-148a-3p	BAI3
hsa-miR-6791-5p	BAIAP2
hsa-miR-4687-3p	BAIAP2L1
hsa-miR-31-5p	BAP1
hsa-miR-423-5p	BAP1
hsa-miR-6779-5p	BARX2
hsa-miR-22-3p	BATF3
hsa-miR-4505	BAZ1B
hsa-miR-3620-5p	BAZ1B
hsa-miR-4492	BAZ1B
hsa-miR-4734	BAZ2A
hsa-miR-6779-5p	BAZ2A
hsa-miR-7150	BAZ2A
hsa-miR-30c-1-3p	BAZ2A
hsa-miR-30e-5p	BAZ2B
hsa-miR-5787	BBC3
hsa-miR-6791-5p	BBC3
hsa-miR-4505	BBC3
hsa-miR-30c-1-3p	BCAM
hsa-miR-98-5p	BCAT1
hsa-miR-6779-5p	BCAT2
hsa-miR-30c-1-3p	BCAT2
hsa-miR-15a-5p	BCL2
hsa-miR-140-3p	BCL2
hsa-miR-1273g-3p	BCL2L11
hsa-miR-101-3p	BCL2L11
hsa-miR-3609	BCL2L11
hsa-miR-148b-3p	BCL2L11
hsa-miR-148a-3p	BCL2L11
hsa-miR-15a-5p	BCL2L2
hsa-miR-22-3p	BCL6B
hsa-miR-6126	BCL6B
hsa-miR-15a-5p	BCL7A
hsa-miR-148a-3p	BCL7A
hsa-miR-4472	BCL7B
hsa-miR-22-3p	BCL9
hsa-miR-30d-5p	BCL9
hsa-miR-30c-1-3p	BCL9
hsa-miR-22-3p	BCL9L
hsa-miR-15a-5p	BCL9L
hsa-miR-5787	BCL9L
hsa-miR-4505	BCL9L
hsa-miR-7150	BCL9L
hsa-miR-30c-1-3p	BCL9L
hsa-miR-181a-5p	BCLAF1
hsa-miR-155-5p	BCORL1
hsa-miR-30e-5p	BEND4
hsa-miR-30d-5p	BEND4
hsa-miR-98-5p	BEND4
hsa-miR-1246	BEND4
hsa-miR-3620-5p	BEND7
hsa-miR-15a-5p	BFAR
hsa-miR-15a-5p	BHLHE41
hsa-miR-101-3p	BICD2
hsa-miR-140-3p	BICD2
hsa-miR-4301	BICD2
hsa-miR-7150	BICD2
hsa-miR-22-3p	BIN1
hsa-miR-4734	BIN1
hsa-miR-30e-5p	BIRC6
hsa-miR-423-5p	BMF
hsa-miR-4447	BMF
hsa-miR-3607-5p	BMF
hsa-miR-4472	BMF
hsa-miR-6073	BMP3
hsa-miR-1273g-3p	BMPR2
hsa-miR-3609	BMPR2
hsa-miR-30e-5p	BNC2
hsa-miR-5096	BNC2
hsa-miR-30d-5p	BNC2
hsa-miR-155-5p	BNC2
hsa-miR-22-3p	BOLL
hsa-miR-15a-5p	BPTF
hsa-miR-30c-1-3p	BPTF
hsa-miR-5787	BRD2
hsa-miR-4505	BRD2
hsa-miR-4492	BRD3
hsa-miR-5787	BRD4
hsa-miR-4447	BRD4
hsa-miR-4472	BRD4
hsa-miR-4505	BRD4
hsa-miR-181a-5p	BRWD1
hsa-miR-30e-5p	BRWD1
hsa-miR-5096	BRWD1
hsa-miR-3609	BRWD1
hsa-miR-22-3p	BRWD3
hsa-miR-6791-5p	BSDC1
hsa-miR-1275	BSDC1
hsa-miR-1273g-3p	BSN
hsa-miR-6791-5p	BSN
hsa-miR-30c-1-3p	BSN
hsa-miR-15a-5p	BTAF1
hsa-miR-4447	BTBD11
hsa-miR-4472	BTBD11
hsa-miR-181a-5p	BTBD3
hsa-miR-101-3p	BTBD3
hsa-miR-181c-5p	BTBD3
hsa-miR-194-5p	BTBD7
hsa-miR-3609	BTBD9
hsa-miR-6779-5p	BTBD9
hsa-miR-4492	BTBD9
hsa-miR-30c-1-3p	BTBD9
hsa-miR-3609	BTG2
hsa-miR-15a-5p	BTLA
hsa-miR-6073	BTLA
hsa-miR-15a-5p	BTRC
hsa-miR-5787	BTRC
hsa-miR-4505	BTRC
hsa-miR-6779-5p	BVES
hsa-miR-98-5p	BZW1
hsa-miR-5096	C1QTNF7
hsa-miR-7150	C1QTNF7
hsa-miR-3609	C2
hsa-miR-22-3p	C2CD2L
hsa-miR-30c-1-3p	C2CD2L
hsa-miR-6791-5p	CA5B
hsa-miR-15a-5p	CAB39
hsa-miR-550a-5p	CAB39
hsa-miR-7150	CABLES1
hsa-miR-148b-3p	CABP7
hsa-miR-5787	CACNA1B
hsa-miR-6791-5p	CACNA1C
hsa-miR-4472	CACNA1C
hsa-miR-15a-5p	CACNA1E
hsa-miR-6803-5p	CACNA2D2
hsa-miR-423-5p	CACNA2D2
hsa-miR-6791-5p	CACNB1
hsa-miR-101-3p	CACNB2
hsa-miR-30c-1-3p	CACNB2
hsa-miR-4492	CACNB3
hsa-miR-550a-5p	CACNB3
hsa-miR-101-3p	CADM1
hsa-miR-148b-3p	CADM1
hsa-miR-5787	CADM3
hsa-miR-425-5p	CADM4
hsa-miR-30e-5p	CADPS
hsa-miR-30d-5p	CADPS
hsa-miR-181a-5p	CALCR
hsa-miR-22-3p	CALCR
hsa-miR-30d-5p	CALCR
hsa-miR-31-5p	CALCR
hsa-miR-15a-5p	CALM1
hsa-miR-1246	CALM2
hsa-miR-361-5p	CALM3
hsa-miR-6779-5p	CALN1
hsa-miR-30c-1-3p	CALN1
hsa-miR-6791-5p	CAMK2A
hsa-miR-7150	CAMK2A
hsa-miR-30c-1-3p	CAMK2A
hsa-miR-4492	CAMK2G
hsa-miR-181a-5p	CAMKK1
hsa-miR-6791-5p	CAMKK1
hsa-miR-5096	CAMKK2
hsa-miR-5787	CAMKV
hsa-miR-4505	CAMKV
hsa-miR-181a-5p	CAMSAP1
hsa-miR-181c-5p	CAMSAP1
hsa-miR-181a-5p	CAMSAP1L1
hsa-miR-101-3p	CAMTA1
hsa-miR-155-5p	CAMTA1
hsa-miR-7150	CAMTA1
hsa-miR-181a-5p	CAMTA2
hsa-miR-5787	CAMTA2
hsa-miR-423-5p	CAMTA2
hsa-miR-4505	CAMTA2
hsa-miR-181c-5p	CAMTA2
hsa-miR-148a-3p	CAND1
hsa-miR-98-5p	CANT1
hsa-miR-22-3p	CAPN1
hsa-miR-15a-5p	CAPN6
hsa-miR-1273g-3p	CAPN6
hsa-miR-1275	CAPN6
hsa-miR-181a-5p	CAPRIN1
hsa-miR-15a-5p	CAPRIN1
hsa-miR-181c-5p	CAPRIN1
hsa-miR-181a-5p	CAPRIN2
hsa-miR-181c-5p	CAPRIN2
hsa-miR-15a-5p	CAPZA2
hsa-miR-181a-5p	CARD11
hsa-miR-181c-5p	CARD11
hsa-miR-155-5p	CARHSP1
hsa-miR-181a-5p	CARM1
hsa-miR-423-5p	CARM1
hsa-miR-181c-5p	CARM1
hsa-miR-6803-5p	CASC3
hsa-miR-15a-5p	CASK
hsa-miR-4687-3p	CASK
hsa-miR-1275	CASKIN2
hsa-miR-181a-5p	CASP10
hsa-miR-6779-5p	CASP2
hsa-miR-15a-5p	CASZ1
hsa-miR-151b	CASZ1
hsa-miR-151a-5p	CASZ1
hsa-miR-1246	CAV1
hsa-miR-22-3p	CAV3
hsa-miR-361-5p	CBFA2T2
hsa-miR-15a-5p	CBFA2T3
hsa-miR-6791-5p	CBFA2T3
hsa-miR-4505	CBFA2T3
hsa-miR-30e-5p	CBFB
hsa-miR-22-3p	CBL
hsa-miR-31-5p	CBL
hsa-miR-140-3p	CBL
hsa-miR-98-5p	CBL
hsa-miR-6791-5p	CBL
hsa-miR-4484	CBL
hsa-miR-181a-5p	CBLL1
hsa-miR-181c-5p	CBLL1
hsa-miR-4447	CBLN3
hsa-miR-3620-5p	CBX1
hsa-miR-181a-5p	CBX5
hsa-miR-1273g-3p	CBX5
hsa-miR-5787	CBX5
hsa-miR-98-5p	CBX5
hsa-miR-6779-5p	CBX5
hsa-miR-4472	CBX5
hsa-miR-7641	CBX5
hsa-miR-7150	CBX5
hsa-miR-22-3p	CBX6
hsa-miR-5787	CBX6
hsa-miR-425-5p	CBX6
hsa-miR-4505	CBX6
hsa-miR-181a-5p	CBX7
hsa-miR-3620-5p	CCDC113
hsa-miR-30e-5p	CCDC117
hsa-miR-30d-5p	CCDC117
hsa-miR-15a-5p	CCDC126
hsa-miR-5787	CCDC157
hsa-miR-15a-5p	CCDC19
hsa-miR-15a-5p	CCDC28A
hsa-miR-22-3p	CCDC47
hsa-miR-3609	CCDC50
hsa-miR-15a-5p	CCDC6
hsa-miR-6803-5p	CCDC6
hsa-miR-423-5p	CCDC64
hsa-miR-6791-5p	CCDC64
hsa-miR-101-3p	CCDC68
hsa-miR-550a-5p	CCDC68
hsa-miR-6791-5p	CCDC69
hsa-miR-148b-3p	CCDC71
hsa-miR-98-5p	CCDC76
hsa-miR-15a-5p	CCDC85C
hsa-miR-140-3p	CCDC85C
hsa-miR-6791-5p	CCDC88A
hsa-miR-3620-5p	CCDC88B
hsa-miR-15a-5p	CCDC88C
hsa-miR-181a-5p	CCDC92
hsa-miR-181c-5p	CCDC92
hsa-miR-98-5p	CCDC93
hsa-miR-4447	CCDC97
hsa-miR-1275	CCDC97
hsa-miR-4472	CCDC97
hsa-miR-148b-3p	CCKBR
hsa-miR-148a-3p	CCKBR
hsa-miR-423-5p	CCL22
hsa-miR-15a-5p	CCND1
hsa-miR-15a-5p	CCND2
hsa-miR-6791-5p	CCND2
hsa-miR-15a-5p	CCNE1
hsa-miR-181a-5p	CCNG1
hsa-miR-181c-5p	CCNG1
hsa-miR-181a-5p	CCNJ
hsa-miR-98-5p	CCNJ
hsa-miR-181c-5p	CCNJ
hsa-miR-22-3p	CCNJL
hsa-miR-15a-5p	CCNJL
hsa-miR-30e-5p	CCNK
hsa-miR-15a-5p	CCNT2
hsa-miR-140-3p	CCNT2
hsa-miR-6073	CCNT2
hsa-miR-30c-1-3p	CCR7
hsa-miR-148b-3p	CCT6A
hsa-miR-3607-5p	CD109
hsa-miR-6779-5p	CD164
hsa-miR-98-5p	CD200R1
hsa-miR-140-3p	CD274
hsa-miR-15a-5p	CD28
hsa-miR-6791-5p	CD4
hsa-miR-181c-5p	CD4
hsa-miR-15a-5p	CDC14B
hsa-miR-98-5p	CDC14B
hsa-miR-181a-5p	CDC27
hsa-miR-181c-5p	CDC27
hsa-miR-98-5p	CDC34
hsa-miR-15a-5p	CDC37L1
hsa-miR-15a-5p	CDC42
hsa-miR-5787	CDC42BPA
hsa-miR-4687-3p	CDC42BPA
hsa-miR-4505	CDC42BPA
hsa-miR-15a-5p	CDC42EP2
hsa-miR-31-5p	CDC42SE1
hsa-miR-423-5p	CDC42SE1
hsa-miR-3620-5p	CDC42SE1
hsa-miR-550a-5p	CDC73
hsa-miR-15a-5p	CDCA4
hsa-miR-7150	CDCP1
hsa-miR-101-3p	CDH11
hsa-miR-5787	CDH24
hsa-miR-101-3p	CDH5
hsa-miR-550a-5p	CDH5
hsa-miR-15a-5p	CDK5R1
hsa-miR-15a-5p	CDK6
hsa-miR-140-3p	CDK6
hsa-miR-148b-3p	CDK8
hsa-miR-22-3p	CDKN1A
hsa-miR-5787	CDKN1A
hsa-miR-5096	CDKN2AIP
hsa-miR-148b-3p	CDON
hsa-miR-148a-3p	CDON
hsa-miR-15a-5p	CDV3
hsa-miR-98-5p	CDV3
hsa-miR-6791-5p	CDX1
hsa-miR-30d-5p	CECR6
hsa-miR-148b-3p	CECR6
hsa-miR-7150	CELSR1
hsa-miR-5787	CELSR2
hsa-miR-6803-5p	CELSR2
hsa-miR-4505	CELSR2
hsa-miR-5787	CELSR3
hsa-miR-423-5p	CENPO
hsa-miR-22-3p	CENPV
hsa-miR-194-5p	CEP350
hsa-miR-5096	CEP68
hsa-miR-7150	CFL1
hsa-miR-7641	CFL2
hsa-miR-6791-5p	CHAC1
hsa-miR-148b-3p	CHD1
hsa-miR-15a-5p	CHD2
hsa-miR-6779-5p	CHD2
hsa-miR-3620-5p	CHD5
hsa-miR-4492	CHD5
hsa-miR-15a-5p	CHD6
hsa-miR-181a-5p	CHD7
hsa-miR-15a-5p	CHD7
hsa-miR-148b-3p	CHD7
hsa-miR-148a-3p	CHD7
hsa-miR-181c-5p	CHD7
hsa-miR-181a-5p	CHD9
hsa-miR-98-5p	CHD9
hsa-miR-148b-3p	CHD9
hsa-miR-148a-3p	CHD9
hsa-miR-15a-5p	CHEK1
hsa-miR-22-3p	CHGA
hsa-miR-15a-5p	CHIC1
hsa-miR-98-5p	CHIC1
hsa-miR-181a-5p	CHL1
hsa-miR-140-3p	CHL1
hsa-miR-31-5p	CHMP7
hsa-miR-4447	CHRD
hsa-miR-4472	CHRD
hsa-miR-5787	CHRM1
hsa-miR-6779-5p	CHRM1
hsa-miR-4505	CHRM1
hsa-miR-148a-3p	CHRNB2
hsa-miR-30d-5p	CHST1
hsa-miR-5787	CHST3
hsa-miR-4505	CHST3
hsa-miR-6779-5p	CHTF8
hsa-miR-30c-1-3p	CHTF8
hsa-miR-5787	CIB1
hsa-miR-4505	CIB1
hsa-miR-6779-5p	CIC
hsa-miR-22-3p	CIITA
hsa-miR-6803-5p	CISD3
hsa-miR-4472	CISD3
hsa-miR-5787	CKM
hsa-miR-181a-5p	CLCC1
hsa-miR-5787	CLCF1
hsa-miR-4505	CLCF1
hsa-miR-98-5p	CLCN5
hsa-miR-155-5p	CLCN5
hsa-miR-7150	CLCN5
hsa-miR-6073	CLCN5
hsa-miR-148b-3p	CLCN6
hsa-miR-148a-3p	CLCN6
hsa-miR-3620-5p	CLCN6
hsa-miR-3620-5p	CLCNKA
hsa-miR-3620-5p	CLCNKB
hsa-miR-15a-5p	CLDN12
hsa-miR-7150	CLDN19
hsa-miR-15a-5p	CLDN2
hsa-miR-5787	CLDN7
hsa-miR-423-5p	CLEC2L
hsa-miR-22-3p	CLIC4
hsa-miR-6791-5p	CLIP3
hsa-miR-1246	CLLU1
hsa-miR-7150	CLMN
hsa-miR-30e-5p	CLN8
hsa-miR-15a-5p	CLOCK
hsa-miR-22-3p	CLPB
hsa-miR-423-5p	CLTB
hsa-miR-5787	CMIP
hsa-miR-4687-3p	CMIP
hsa-miR-4505	CMIP
hsa-miR-4492	CMIP
hsa-miR-5787	CMTM3
hsa-miR-4505	CMTM3
hsa-miR-98-5p	CMTM6
hsa-miR-423-5p	CNBP
hsa-miR-15a-5p	CNIH2
hsa-miR-6803-5p	CNIH2
hsa-miR-1275	CNIH2
hsa-miR-6126	CNIH2
hsa-miR-4492	CNIH2
hsa-miR-6779-5p	CNNM1
hsa-miR-5787	CNNM3
hsa-miR-4505	CNNM3
hsa-miR-6791-5p	CNOT10
hsa-miR-3607-5p	CNOT2
hsa-miR-425-5p	CNOT4
hsa-miR-148b-3p	CNOT6
hsa-miR-148a-3p	CNOT6
hsa-miR-181a-5p	CNOT6L
hsa-miR-15a-5p	CNOT6L
hsa-miR-3609	CNOT6L
hsa-miR-3607-5p	CNOT6L
hsa-miR-6779-5p	CNOT6L
hsa-miR-181c-5p	CNOT6L
hsa-miR-5787	CNP
hsa-miR-31-5p	CNP
hsa-miR-4505	CNP
hsa-miR-4492	CNP
hsa-miR-181a-5p	CNR1
hsa-miR-148b-3p	CNR1
hsa-miR-148a-3p	CNR1
hsa-miR-181c-5p	CNR1
hsa-miR-5787	CNTFR
hsa-miR-6791-5p	CNTFR
hsa-miR-4505	CNTFR
hsa-miR-5096	CNTLN
hsa-miR-7150	CNTN2
hsa-miR-148b-3p	CNTN4
hsa-miR-148a-3p	CNTN4
hsa-miR-15a-5p	COG5
hsa-miR-101-3p	COL10A1
hsa-miR-6779-5p	COL11A2
hsa-miR-15a-5p	COL12A1
hsa-miR-101-3p	COL12A1
hsa-miR-98-5p	COL14A1
hsa-miR-98-5p	COL15A1
hsa-miR-181a-5p	COL16A1
hsa-miR-181c-5p	COL16A1
hsa-miR-6779-5p	COL1A1
hsa-miR-155-5p	COL21A1
hsa-miR-4492	COL23A1
hsa-miR-15a-5p	COL24A1
hsa-miR-30e-5p	COL25A1
hsa-miR-30d-5p	COL25A1
hsa-miR-98-5p	COL4A2
hsa-miR-15a-5p	COL4A3BP
hsa-miR-3607-5p	COL5A1
hsa-miR-30e-5p	COL9A3
hsa-miR-30d-5p	COL9A3
hsa-miR-7150	COMMD10
hsa-miR-1273g-3p	COPS2
hsa-miR-31-5p	COPS2
hsa-miR-22-3p	COPS7B
hsa-miR-30c-1-3p	CORO1C
hsa-miR-5096	CORO2A
hsa-miR-6779-5p	CORO2A
hsa-miR-423-5p	CORO2B
hsa-miR-6779-5p	CORO2B
hsa-miR-31-5p	CORO7
hsa-miR-181a-5p	CPD
hsa-miR-15a-5p	CPD
hsa-miR-98-5p	CPD
hsa-miR-6126	CPD
hsa-miR-3620-5p	CPD
hsa-miR-6073	CPD
hsa-miR-30c-1-3p	CPD
hsa-miR-22-3p	CPEB1
hsa-miR-15a-5p	CPEB2
hsa-miR-30e-5p	CPEB4
hsa-miR-148b-3p	CPEB4
hsa-miR-148a-3p	CPEB4
hsa-miR-5787	CPLX2
hsa-miR-423-5p	CPLX2
hsa-miR-425-5p	CPLX2
hsa-miR-6791-5p	CPLX2
hsa-miR-4505	CPLX2
hsa-miR-3620-5p	CPLX2
hsa-miR-4492	CPLX2
hsa-miR-5787	CPLX3
hsa-miR-6791-5p	CPLX3
hsa-miR-4505	CPLX3
hsa-miR-31-5p	CPM
hsa-miR-4492	CPNE5
hsa-miR-361-5p	CPOX
hsa-miR-181a-5p	CPSF6
hsa-miR-30e-5p	CPSF6
hsa-miR-30d-5p	CPSF6
hsa-miR-181c-5p	CPSF6
hsa-miR-181a-5p	CPT1A
hsa-miR-148b-3p	CPT1A
hsa-miR-5787	CRAT
hsa-miR-98-5p	CRB2
hsa-miR-98-5p	CRCT1
hsa-miR-140-3p	CREB1
hsa-miR-181a-5p	CREBL2
hsa-miR-181c-5p	CREBL2
hsa-miR-3620-5p	CRELD1
hsa-miR-7150	CRELD1
hsa-miR-4734	CRISPLD2
hsa-miR-15a-5p	CRKL
hsa-miR-3620-5p	CRLF3
hsa-miR-6803-5p	CRTAP
hsa-miR-5787	CRTC1
hsa-miR-4505	CRTC1
hsa-miR-4492	CRTC1
hsa-miR-423-5p	CRTC2
hsa-miR-4492	CRTC2
hsa-miR-5787	CRY2
hsa-miR-30c-1-3p	CRY2
hsa-miR-550a-5p	CSDA
hsa-miR-15a-5p	CSDE1
hsa-miR-423-5p	CSF1
hsa-miR-4492	CSF1
hsa-miR-22-3p	CSF1R
hsa-miR-5787	CSK
hsa-miR-181a-5p	CSNK1G1
hsa-miR-5096	CSNK1G1
hsa-miR-425-5p	CSNK1G1
hsa-miR-6779-5p	CSNK1G1
hsa-miR-7150	CSNK1G1
hsa-miR-30c-1-3p	CSNK1G1
hsa-miR-155-5p	CSRNP2
hsa-miR-101-3p	CSRP2
hsa-miR-7150	CTDSP1
hsa-miR-4505	CTDSP2
hsa-miR-181a-5p	CTDSPL
hsa-miR-181c-5p	CTDSPL
hsa-miR-7150	CTDSPL
hsa-miR-98-5p	CTHRC1
hsa-miR-5787	CTNNBIP1
hsa-miR-4505	CTNNBIP1
hsa-miR-425-5p	CTNND1
hsa-miR-6791-5p	CTNS
hsa-miR-550a-5p	CTPS2
hsa-miR-423-5p	CTSA
hsa-miR-3609	CTSA
hsa-miR-148b-3p	CTSA
hsa-miR-30e-5p	CTTNBP2NL
hsa-miR-30d-5p	CTTNBP2NL
hsa-miR-148a-3p	CTTNBP2NL
hsa-miR-4492	CUEDC1
hsa-miR-15a-5p	CUL2
hsa-miR-22-3p	CUL3
hsa-miR-101-3p	CUL3
hsa-miR-194-5p	CUL4B
hsa-miR-148b-3p	CUL5
hsa-miR-4734	CUX1
hsa-miR-3620-5p	CUX1
hsa-miR-4492	CUX2
hsa-miR-5787	CX3CL1
hsa-miR-4505	CX3CL1
hsa-miR-4492	CX3CL1
hsa-miR-30c-1-3p	CXCL12
hsa-miR-6779-5p	CXCR5
hsa-miR-6779-5p	CYB561D1
hsa-miR-4687-3p	CYB5B
hsa-miR-6791-5p	CYB5B
hsa-miR-6126	CYB5RL
hsa-miR-30c-1-3p	CYBASC3
hsa-miR-98-5p	CYP19A1
hsa-miR-181c-5p	CYP26B1
hsa-miR-7150	CYP26B1
hsa-miR-7150	CYP27B1
hsa-miR-98-5p	CYP46A1
hsa-miR-22-3p	CYR61
hsa-miR-22-3p	CYTH3
hsa-miR-148a-3p	CYTH3
hsa-miR-30c-1-3p	DAAM2
hsa-miR-6791-5p	DAB2IP
hsa-miR-4484	DAG1
hsa-miR-30d-5p	DAGLA
hsa-miR-6803-5p	DAGLA
hsa-miR-423-5p	DAGLA
hsa-miR-6791-5p	DAGLA
hsa-miR-6779-5p	DAGLA
hsa-miR-4472	DAGLA
hsa-miR-7150	DAGLA
hsa-miR-98-5p	DAPK1
hsa-miR-6779-5p	DAPK2
hsa-miR-140-3p	DAZAP2
hsa-miR-6779-5p	DAZAP2
hsa-miR-3620-5p	DBNDD1
hsa-miR-6791-5p	DBP
hsa-miR-101-3p	DCBLD2
hsa-miR-194-5p	DCBLD2
hsa-miR-30c-1-3p	DCBLD2
hsa-miR-3620-5p	DCDC2B
hsa-miR-15a-5p	DCLK1
hsa-miR-7641	DCLK1
hsa-miR-181a-5p	DCN
hsa-miR-181c-5p	DCN
hsa-miR-30e-5p	DCP1A
hsa-miR-15a-5p	DCP1A
hsa-miR-148a-3p	DCP2
hsa-miR-3607-5p	DCTD
hsa-miR-30e-5p	DCTN4
hsa-miR-30d-5p	DCTN4
hsa-miR-6791-5p	DCTN5
hsa-miR-98-5p	DCUN1D3
hsa-miR-1273g-3p	DCUN1D4
hsa-miR-194-5p	DCUN1D4
hsa-miR-30e-5p	DCX
hsa-miR-30d-5p	DCX
hsa-miR-4687-3p	DCX
hsa-miR-3620-5p	DCX
hsa-miR-148b-3p	DDAH1
hsa-miR-148a-3p	DDAH1
hsa-miR-1273g-3p	DDHD2
hsa-miR-148b-3p	DDHD2
hsa-miR-181a-5p	DDIT4
hsa-miR-30e-5p	DDIT4
hsa-miR-22-3p	DDIT4
hsa-miR-30d-5p	DDIT4
hsa-miR-101-3p	DDIT4
hsa-miR-181c-5p	DDIT4
hsa-miR-140-3p	DDN
hsa-miR-98-5p	DDX19A
hsa-miR-98-5p	DDX19B
hsa-miR-6791-5p	DDX23
hsa-miR-181a-5p	DDX3X
hsa-miR-181c-5p	DDX3X
hsa-miR-7150	DDX3X
hsa-miR-181a-5p	DDX3Y
hsa-miR-181c-5p	DDX3Y
hsa-miR-148b-3p	DEDD
hsa-miR-15a-5p	DEF8
hsa-miR-4492	DEF8
hsa-miR-361-5p	DEM1
hsa-miR-6791-5p	DENND1A
hsa-miR-15a-5p	DENND4A
hsa-miR-1273g-3p	DENR
hsa-miR-194-5p	DEPDC1B
hsa-miR-6779-5p	DERL1
hsa-miR-181c-5p	DERL1
hsa-miR-155-5p	DET1
hsa-miR-30e-5p	DEXI
hsa-miR-30d-5p	DEXI
hsa-miR-5787	DFNB31
hsa-miR-4505	DFNB31
hsa-miR-181a-5p	DGCR2
hsa-miR-31-5p	DGCR8
hsa-miR-7150	DGKA
hsa-miR-22-3p	DGKE
hsa-miR-140-3p	DGKG
hsa-miR-6791-5p	DGKZ
hsa-miR-31-5p	DHCR24
hsa-miR-4505	DHCR24
hsa-miR-3620-5p	DHDDS
hsa-miR-148b-3p	DHRS13
hsa-miR-148a-3p	DHRS13
hsa-miR-15a-5p	DHTKD1
hsa-miR-155-5p	DHX40
hsa-miR-98-5p	DHX57
hsa-miR-4492	DHX8
hsa-miR-15a-5p	DICER1
hsa-miR-98-5p	DICER1
hsa-miR-3607-5p	DICER1
hsa-miR-30d-5p	DIO2
hsa-miR-5096	DIP2A
hsa-miR-101-3p	DIP2B
hsa-miR-3607-5p	DIP2B
hsa-miR-181a-5p	DIP2C
hsa-miR-3609	DIP2C
hsa-miR-30c-1-3p	DIS3
hsa-miR-6791-5p	DLG3
hsa-miR-101-3p	DLG5
hsa-miR-30e-5p	DLGAP1
hsa-miR-30d-5p	DLGAP1
hsa-miR-181a-5p	DLGAP2
hsa-miR-22-3p	DLGAP2
hsa-miR-15a-5p	DLGAP2
hsa-miR-181c-5p	DLGAP2
hsa-miR-101-3p	DLGAP3
hsa-miR-6791-5p	DLGAP3
hsa-miR-423-5p	DLGAP4
hsa-miR-15a-5p	DLST
hsa-miR-98-5p	DLST
hsa-miR-1273g-3p	DLX2
hsa-miR-5787	DMBX1
hsa-miR-6791-5p	DMBX1
hsa-miR-4505	DMBX1
hsa-miR-148b-3p	DMPK
hsa-miR-148a-3p	DMPK
hsa-miR-148b-3p	DMRTA2
hsa-miR-148a-3p	DMRTA2
hsa-miR-15a-5p	DMTF1
hsa-miR-6073	DMTF1
hsa-miR-5787	DMWD
hsa-miR-1275	DMWD
hsa-miR-7150	DMWD
hsa-miR-148b-3p	DMXL1
hsa-miR-181a-5p	DNAJA4
hsa-miR-3609	DNAJA4
hsa-miR-148b-3p	DNAJB12
hsa-miR-148a-3p	DNAJB12
hsa-miR-15a-5p	DNAJB4
hsa-miR-22-3p	DNAJB5
hsa-miR-5787	DNAJB5
hsa-miR-15a-5p	DNAJC16
hsa-miR-550a-5p	DNAJC16
hsa-miR-4492	DND1
hsa-miR-5787	DNM2
hsa-miR-6791-5p	DNM2
hsa-miR-4505	DNM2
hsa-miR-22-3p	DNM3
hsa-miR-6791-5p	DNMT3A
hsa-miR-6779-5p	DNMT3A
hsa-miR-7150	DNMT3A
hsa-miR-550a-5p	DNMT3B
hsa-miR-31-5p	DOCK1
hsa-miR-5787	DOCK3
hsa-miR-6791-5p	DOCK3
hsa-miR-4505	DOCK3
hsa-miR-148b-3p	DOCK6
hsa-miR-148a-3p	DOCK6
hsa-miR-5096	DOK4
hsa-miR-15a-5p	DOLPP1
hsa-miR-22-3p	DPF2
hsa-miR-550a-5p	DPF3
hsa-miR-22-3p	DPM2
hsa-miR-3607-5p	DPP10
hsa-miR-181a-5p	DPP6
hsa-miR-181c-5p	DPP6
hsa-miR-30c-1-3p	DPP6
hsa-miR-5787	DPYSL5
hsa-miR-148b-3p	DPYSL5
hsa-miR-148a-3p	DPYSL5
hsa-miR-550a-5p	DPYSL5
hsa-miR-5787	DRP2
hsa-miR-15a-5p	DSCR3
hsa-miR-5096	DSEL
hsa-miR-30e-5p	DSTYK
hsa-miR-3607-5p	DTNA
hsa-miR-155-5p	DTNA
hsa-miR-4447	DTX3
hsa-miR-4472	DTX3
hsa-miR-7150	DTX3L
hsa-miR-140-3p	DTX4
hsa-miR-98-5p	DUSP16
hsa-miR-98-5p	DUSP4
hsa-miR-4734	DUSP8
hsa-miR-1275	DUSP9
hsa-miR-5787	DVL3
hsa-miR-98-5p	DVL3
hsa-miR-4505	DVL3
hsa-miR-15a-5p	DYNC1LI2
hsa-miR-148b-3p	DYNLL2
hsa-miR-148a-3p	DYNLL2
hsa-miR-101-3p	DYRK1A
hsa-miR-3609	DYRK1A
hsa-miR-6791-5p	DYRK2
hsa-miR-181c-5p	DYRK2
hsa-miR-6791-5p	E2F1
hsa-miR-31-5p	E2F2
hsa-miR-98-5p	E2F2
hsa-miR-6791-5p	E2F2
hsa-miR-15a-5p	E2F3
hsa-miR-30c-1-3p	E2F3
hsa-miR-98-5p	E2F6
hsa-miR-181a-5p	E2F7
hsa-miR-181c-5p	E2F7
hsa-miR-6073	EBF1
hsa-miR-3609	EBF3
hsa-miR-181a-5p	ECT2L
hsa-miR-181c-5p	ECT2L
hsa-miR-22-3p	EDA
hsa-miR-15a-5p	EDA
hsa-miR-5787	EDA
hsa-miR-4687-3p	EDA
hsa-miR-30e-5p	EDC3
hsa-miR-30d-5p	EDC3
hsa-miR-3607-5p	EDEM1
hsa-miR-98-5p	EDEM3
hsa-miR-30e-5p	EDNRA
hsa-miR-30d-5p	EDNRA
hsa-miR-181a-5p	EED
hsa-miR-30e-5p	EED
hsa-miR-30d-5p	EED
hsa-miR-98-5p	EEF2K
hsa-miR-3620-5p	EEF2K
hsa-miR-5787	EFHD2
hsa-miR-4505	EFHD2
hsa-miR-5787	EFNB3
hsa-miR-4505	EFNB3
hsa-miR-6791-5p	EFTUD2
hsa-miR-7150	EGLN2
hsa-miR-4687-3p	EGR1
hsa-miR-140-3p	EGR3
hsa-miR-550a-5p	EGR3
hsa-miR-5787	EHD2
hsa-miR-4505	EHD2
hsa-miR-3609	EHD3
hsa-miR-7150	EI24
hsa-miR-6791-5p	EIF1AD
hsa-miR-148b-3p	EIF2C1
hsa-miR-148a-3p	EIF2C1
hsa-miR-30e-5p	EIF2C3
hsa-miR-4484	EIF2C3
hsa-miR-181a-5p	EIF2C4
hsa-miR-15a-5p	EIF2C4
hsa-miR-148b-3p	EIF2C4
hsa-miR-148a-3p	EIF2C4
hsa-miR-181c-5p	EIF2C4
hsa-miR-98-5p	EIF2S2
hsa-miR-15a-5p	EIF3A
hsa-miR-181a-5p	EIF4A2
hsa-miR-181c-5p	EIF4A2
hsa-miR-15a-5p	EIF4B
hsa-miR-1273g-3p	EIF4B
hsa-miR-4484	EIF4E
hsa-miR-6791-5p	EIF4E3
hsa-miR-31-5p	EIF4EBP2
hsa-miR-6779-5p	EIF4EBP2
hsa-miR-5787	EIF4G1
hsa-miR-3609	EIF4G3
hsa-miR-3609	EIF5
hsa-miR-15a-5p	EIF5A2
hsa-miR-31-5p	EIF5A2
hsa-miR-3609	ELAVL2
hsa-miR-148b-3p	ELAVL2
hsa-miR-181c-5p	ELAVL2
hsa-miR-5787	ELAVL3
hsa-miR-1275	ELAVL3
hsa-miR-4505	ELAVL3
hsa-miR-7150	ELAVL3
hsa-miR-181a-5p	ELAVL4
hsa-miR-6073	ELF2
hsa-miR-101-3p	ELF5
hsa-miR-423-5p	ELFN2
hsa-miR-6791-5p	ELFN2
hsa-miR-5787	ELK1
hsa-miR-6791-5p	ELK1
hsa-miR-6779-5p	ELK1
hsa-miR-1275	ELK1
hsa-miR-4505	ELK1
hsa-miR-3620-5p	ELK1
hsa-miR-4492	ELK1
hsa-miR-15a-5p	ELL
hsa-miR-30d-5p	ELL
hsa-miR-15a-5p	ELL2
hsa-miR-30e-5p	ELMOD2
hsa-miR-30d-5p	ELMOD2
hsa-miR-101-3p	ELN
hsa-miR-6791-5p	ELN
hsa-miR-30e-5p	ELOVL5
hsa-miR-361-5p	ELOVL7
hsa-miR-4505	EME1
hsa-miR-22-3p	EMILIN3
hsa-miR-5787	EMILIN3
hsa-miR-4505	EMILIN3
hsa-miR-6126	EML4
hsa-miR-15a-5p	EML6
hsa-miR-101-3p	EMP1
hsa-miR-31-5p	EMP1
hsa-miR-6791-5p	EMP1
hsa-miR-3607-5p	EMP1
hsa-miR-101-3p	EMP2
hsa-miR-7641	EMP2
hsa-miR-15a-5p	EMX1
hsa-miR-15a-5p	EN2
hsa-miR-140-3p	EN2
hsa-miR-15a-5p	ENAH
hsa-miR-6791-5p	ENAH
hsa-miR-7641	ENAH
hsa-miR-6126	ENAH
hsa-miR-423-5p	ENC1
hsa-miR-4492	ENG
hsa-miR-423-5p	ENGASE
hsa-miR-3620-5p	ENOSF1
hsa-miR-5787	ENSA
hsa-miR-181a-5p	ENTPD6
hsa-miR-181c-5p	ENTPD6
hsa-miR-15a-5p	ENTPD7
hsa-miR-101-3p	ENY2
hsa-miR-7150	EP300
hsa-miR-181a-5p	EPB41
hsa-miR-30e-5p	EPB41
hsa-miR-6126	EPB41
hsa-miR-181c-5p	EPB41
hsa-miR-181a-5p	EPB41L3
hsa-miR-181c-5p	EPB41L3
hsa-miR-15a-5p	EPB41L4B
hsa-miR-3609	EPB41L5
hsa-miR-6791-5p	EPB41L5
hsa-miR-30e-5p	EPDR1
hsa-miR-15a-5p	EPHA1
hsa-miR-7150	EPHA10
hsa-miR-140-3p	EPHA4
hsa-miR-98-5p	EPHA4
hsa-miR-181a-5p	EPHA5
hsa-miR-194-5p	EPHA5
hsa-miR-4492	EPHA8
hsa-miR-30d-5p	EPHB2
hsa-miR-5787	EPHB3
hsa-miR-4492	EPHB3
hsa-miR-6791-5p	EPN2
hsa-miR-148b-3p	EPS15
hsa-miR-148a-3p	EPS15
hsa-miR-181c-5p	EPS15
hsa-miR-4687-3p	EPS8L1
hsa-miR-101-3p	ERBB2IP
hsa-miR-22-3p	ERBB3
hsa-miR-101-3p	ERBB4
hsa-miR-1273g-3p	ERC1
hsa-miR-3609	ERC1
hsa-miR-98-5p	ERCC4
hsa-miR-423-5p	ERF
hsa-miR-4447	ERF
hsa-miR-6779-5p	ERF
hsa-miR-361-5p	ERG
hsa-miR-194-5p	ERGIC2
hsa-miR-181a-5p	ERI1
hsa-miR-181c-5p	ERI1
hsa-miR-3620-5p	ERI3
hsa-miR-181a-5p	ERLIN2
hsa-miR-5096	ERLIN2
hsa-miR-101-3p	ERLIN2
hsa-miR-3609	ERLIN2
hsa-miR-181c-5p	ERLIN2
hsa-miR-148b-3p	ERMP1
hsa-miR-101-3p	ERP44
hsa-miR-425-5p	ERP44
hsa-miR-6791-5p	ERP44
hsa-miR-30e-5p	ERRFI1
hsa-miR-101-3p	ESCO1
hsa-miR-181a-5p	ESM1
hsa-miR-181c-5p	ESM1
hsa-miR-98-5p	ESPL1
hsa-miR-30e-5p	ESPN
hsa-miR-15a-5p	ESPN
hsa-miR-181a-5p	ESR1
hsa-miR-22-3p	ESR1
hsa-miR-148a-3p	ESR1
hsa-miR-181c-5p	ESR1
hsa-miR-15a-5p	ESRP2
hsa-miR-5096	ETF1
hsa-miR-3607-5p	ETF1
hsa-miR-15a-5p	ETNK1
hsa-miR-7641	ETNK1
hsa-miR-3609	ETS1
hsa-miR-7641	ETS2
hsa-miR-22-3p	ETV1
hsa-miR-3609	ETV1
hsa-miR-7150	ETV6
hsa-miR-15a-5p	EXOC3L2
hsa-miR-181a-5p	EXOSC3
hsa-miR-181c-5p	EXOSC3
hsa-miR-5096	EXTL3
hsa-miR-15a-5p	EYA1
hsa-miR-101-3p	EYA1
hsa-miR-6791-5p	EYA1
hsa-miR-148b-3p	EYA3
hsa-miR-148a-3p	EYA3
hsa-miR-15a-5p	EYA4
hsa-miR-15a-5p	EZH1
hsa-miR-98-5p	EZH1
hsa-miR-3609	EZH1
hsa-miR-101-3p	EZH2
hsa-miR-98-5p	EZH2
hsa-miR-3609	F3
hsa-miR-148b-3p	F3
hsa-miR-148a-3p	F3
hsa-miR-7150	FA2H
hsa-miR-15a-5p	FADS6
hsa-miR-5787	FAF2
hsa-miR-140-3p	FAF2
hsa-miR-30e-5p	FAHD1
hsa-miR-30d-5p	FAHD1
hsa-miR-1273g-3p	FAIM2
hsa-miR-5787	FAIM2
hsa-miR-4687-3p	FAIM2
hsa-miR-4505	FAIM2
hsa-miR-6779-5p	FAM102A
hsa-miR-98-5p	FAM103A1
hsa-miR-98-5p	FAM104A
hsa-miR-148b-3p	FAM104A
hsa-miR-148a-3p	FAM104A
hsa-miR-155-5p	FAM104A
hsa-miR-148b-3p	FAM104B
hsa-miR-148a-3p	FAM104B
hsa-miR-140-3p	FAM105B
hsa-miR-6126	FAM105B
hsa-miR-101-3p	FAM108B1
hsa-miR-30d-5p	FAM109A
hsa-miR-22-3p	FAM117A
hsa-miR-6779-5p	FAM117A
hsa-miR-30c-1-3p	FAM117A
hsa-miR-3609	FAM117B
hsa-miR-30c-1-3p	FAM117B
hsa-miR-31-5p	FAM118A
hsa-miR-4687-3p	FAM120C
hsa-miR-31-5p	FAM120C
hsa-miR-15a-5p	FAM122B
hsa-miR-30e-5p	FAM123B
hsa-miR-15a-5p	FAM123B
hsa-miR-30d-5p	FAM123B
hsa-miR-148b-3p	FAM123B
hsa-miR-30c-1-3p	FAM123B
hsa-miR-98-5p	FAM123C
hsa-miR-22-3p	FAM125B
hsa-miR-140-3p	FAM125B
hsa-miR-181c-5p	FAM125B
hsa-miR-5096	FAM126B
hsa-miR-4492	FAM129A
hsa-miR-15a-5p	FAM133B
hsa-miR-31-5p	FAM134B
hsa-miR-1275	FAM134C
hsa-miR-15a-5p	FAM135A
hsa-miR-425-5p	FAM135B
hsa-miR-3620-5p	FAM13A
hsa-miR-5787	FAM155B
hsa-miR-6791-5p	FAM155B
hsa-miR-6779-5p	FAM155B
hsa-miR-4505	FAM155B
hsa-miR-7150	FAM155B
hsa-miR-30d-5p	FAM160B1
hsa-miR-4505	FAM166B
hsa-miR-3609	FAM168A
hsa-miR-181c-5p	FAM171A1
hsa-miR-423-5p	FAM172A
hsa-miR-4492	FAM172A
hsa-miR-98-5p	FAM178A
hsa-miR-181a-5p	FAM179B
hsa-miR-101-3p	FAM179B
hsa-miR-148b-3p	FAM21C
hsa-miR-148a-3p	FAM21C
hsa-miR-3609	FAM46B
hsa-miR-181c-5p	FAM49A
hsa-miR-31-5p	FAM53B
hsa-miR-4505	FAM53B
hsa-miR-7150	FAM53C
hsa-miR-4505	FAM57B
hsa-miR-1273g-3p	FAM60A
hsa-miR-15a-5p	FAM63B
hsa-miR-5787	FAM65A
hsa-miR-4505	FAM65A
hsa-miR-15a-5p	FAM70A
hsa-miR-15a-5p	FAM73A
hsa-miR-181a-5p	FAM73B
hsa-miR-30d-5p	FAM73B
hsa-miR-148b-3p	FAM73B
hsa-miR-148a-3p	FAM73B
hsa-miR-6126	FAM73B
hsa-miR-6791-5p	FAM78A
hsa-miR-98-5p	FAM84B
hsa-miR-98-5p	FAS
hsa-miR-98-5p	FASLG
hsa-miR-550a-5p	FAT2
hsa-miR-15a-5p	FAT4
hsa-miR-3609	FBN1
hsa-miR-101-3p	FBN2
hsa-miR-148b-3p	FBN3
hsa-miR-148a-3p	FBN3
hsa-miR-22-3p	FBRS
hsa-miR-5787	FBRS
hsa-miR-6803-5p	FBRS
hsa-miR-6779-5p	FBRS
hsa-miR-6791-5p	FBRSL1
hsa-miR-4492	FBXL16
hsa-miR-6791-5p	FBXL19
hsa-miR-4472	FBXL19
hsa-miR-140-3p	FBXL20
hsa-miR-3609	FBXL3
hsa-miR-550a-5p	FBXL7
hsa-miR-15a-5p	FBXO10
hsa-miR-6791-5p	FBXO10
hsa-miR-6779-5p	FBXO10
hsa-miR-181a-5p	FBXO11
hsa-miR-148b-3p	FBXO11
hsa-miR-181c-5p	FBXO11
hsa-miR-15a-5p	FBXO21
hsa-miR-140-3p	FBXO21
hsa-miR-148b-3p	FBXO28
hsa-miR-148a-3p	FBXO28
hsa-miR-4492	FBXO31
hsa-miR-181a-5p	FBXO33
hsa-miR-140-3p	FBXO33
hsa-miR-181c-5p	FBXO33
hsa-miR-140-3p	FBXO34
hsa-miR-22-3p	FBXO41
hsa-miR-5096	FBXO41
hsa-miR-5787	FBXO41
hsa-miR-4687-3p	FBXO41
hsa-miR-6791-5p	FBXO41
hsa-miR-4505	FBXO41
hsa-miR-4492	FBXO41
hsa-miR-7150	FBXO41
hsa-miR-6791-5p	FBXO44
hsa-miR-98-5p	FBXO45
hsa-miR-5787	FBXO46
hsa-miR-4505	FBXO46
hsa-miR-1273g-3p	FBXW2
hsa-miR-22-3p	FBXW7
hsa-miR-15a-5p	FBXW7
hsa-miR-101-3p	FBXW7
hsa-miR-5787	FCHSD1
hsa-miR-3609	FEM1C
hsa-miR-6791-5p	FGD1
hsa-miR-5096	FGD4
hsa-miR-98-5p	FGD6
hsa-miR-98-5p	FGF11
hsa-miR-6803-5p	FGF17
hsa-miR-155-5p	FGF7
hsa-miR-15a-5p	FGF9
hsa-miR-5787	FGFR1
hsa-miR-4492	FGFR1
hsa-miR-22-3p	FGFR1OP2
hsa-miR-101-3p	FGFR3
hsa-miR-6779-5p	FHDC1
hsa-miR-181a-5p	FKBP1A
hsa-miR-30c-1-3p	FKBP5
hsa-miR-30c-1-3p	FLJ25363
hsa-miR-5787	FLNC
hsa-miR-4447	FLNC
hsa-miR-4472	FLNC
hsa-miR-4505	FLNC
hsa-miR-5787	FLOT2
hsa-miR-4505	FLOT2
hsa-miR-101-3p	FLRT2
hsa-miR-3609	FLRT3
hsa-miR-6779-5p	FLT1
hsa-miR-3620-5p	FLT1
hsa-miR-15a-5p	FLT3
hsa-miR-30d-5p	FLVCR1
hsa-miR-6779-5p	FMN1
hsa-miR-22-3p	FMNL2
hsa-miR-5787	FMNL3
hsa-miR-423-5p	FMNL3
hsa-miR-4505	FMNL3
hsa-miR-30c-1-3p	FMO1
hsa-miR-194-5p	FMR1
hsa-miR-148b-3p	FMR1
hsa-miR-148a-3p	FMR1
hsa-miR-22-3p	FNBP4
hsa-miR-30d-5p	FNDC3A
hsa-miR-98-5p	FNDC3A
hsa-miR-3609	FNDC3B
hsa-miR-98-5p	FNIP1
hsa-miR-6779-5p	FNIP1
hsa-miR-15a-5p	FNIP2
hsa-miR-15a-5p	FNTA
hsa-miR-181a-5p	FOS
hsa-miR-101-3p	FOS
hsa-miR-181c-5p	FOS
hsa-miR-155-5p	FOS
hsa-miR-5787	FOSB
hsa-miR-4505	FOSB
hsa-miR-7150	FOSB
hsa-miR-423-5p	FOSL2
hsa-miR-6791-5p	FOSL2
hsa-miR-5096	FOXA2
hsa-miR-3609	FOXJ3
hsa-miR-425-5p	FOXJ3
hsa-miR-7150	FOXJ3
hsa-miR-181a-5p	FOXK1
hsa-miR-15a-5p	FOXK1
hsa-miR-140-3p	FOXK2
hsa-miR-5096	FOXN3
hsa-miR-4505	FOXN3
hsa-miR-15a-5p	FOXO1
hsa-miR-6073	FOXO1
hsa-miR-3607-5p	FOXO3
hsa-miR-155-5p	FOXO3
hsa-miR-5787	FOXO4
hsa-miR-1275	FOXO4
hsa-miR-4505	FOXO4
hsa-miR-22-3p	FOXP1
hsa-miR-15a-5p	FOXP2
hsa-miR-1273g-3p	FOXP2
hsa-miR-5787	FOXP3
hsa-miR-4505	FOXP3
hsa-miR-5787	FOXP4
hsa-miR-423-5p	FOXP4
hsa-miR-4447	FOXP4
hsa-miR-4472	FOXP4
hsa-miR-4505	FOXP4
hsa-miR-98-5p	FRAS1
hsa-miR-22-3p	FREM2
hsa-miR-98-5p	FREM2
hsa-miR-7641	FRMD4A
hsa-miR-6779-5p	FRMD5
hsa-miR-3620-5p	FRMPD4
hsa-miR-181a-5p	FRS2
hsa-miR-3609	FRS2
hsa-miR-148b-3p	FRYL
hsa-miR-148a-3p	FRYL
hsa-miR-6803-5p	FSCN3
hsa-miR-6126	FSTL4
hsa-miR-22-3p	FTL
hsa-miR-15a-5p	FUBP1
hsa-miR-5787	FURIN
hsa-miR-6779-5p	FURIN
hsa-miR-4505	FURIN
hsa-miR-6791-5p	FUT10
hsa-miR-22-3p	FUT9
hsa-miR-15a-5p	FXC1
hsa-miR-3607-5p	FXN
hsa-miR-155-5p	FXR1
hsa-miR-6791-5p	FXR2
hsa-miR-30e-5p	FZD3
hsa-miR-1273g-3p	FZD3
hsa-miR-31-5p	FZD4
hsa-miR-194-5p	FZD4
hsa-miR-6779-5p	FZD4
hsa-miR-30c-1-3p	FZD4
hsa-miR-3609	G2E3
hsa-miR-101-3p	G3BP2
hsa-miR-423-5p	G3BP2
hsa-miR-101-3p	GAB1
hsa-miR-140-3p	GAB2
hsa-miR-6791-5p	GAB2
hsa-miR-6126	GAB2
hsa-miR-4492	GAB2
hsa-miR-140-3p	GABBR1
hsa-miR-30c-1-3p	GABBR1
hsa-miR-22-3p	GABBR2
hsa-miR-101-3p	GABBR2
hsa-miR-181a-5p	GABRA1
hsa-miR-181c-5p	GABRA1
hsa-miR-7150	GABRA3
hsa-miR-3620-5p	GABRA4
hsa-miR-101-3p	GABRB2
hsa-miR-140-3p	GABRB2
hsa-miR-181a-5p	GAD2
hsa-miR-181c-5p	GAD2
hsa-miR-6779-5p	GALE
hsa-miR-30e-5p	GALNT1
hsa-miR-7150	GALNT10
hsa-miR-30e-5p	GALNT2
hsa-miR-30d-5p	GALNT2
hsa-miR-30e-5p	GALNT3
hsa-miR-30d-5p	GALNT3
hsa-miR-181a-5p	GALNTL1
hsa-miR-181c-5p	GALNTL1
hsa-miR-98-5p	GAN
hsa-miR-148b-3p	GAPVD1
hsa-miR-148a-3p	GAPVD1
hsa-miR-181a-5p	GAS7
hsa-miR-6791-5p	GAS7
hsa-miR-181c-5p	GAS7
hsa-miR-15a-5p	GATA4
hsa-miR-4492	GATAD2A
hsa-miR-22-3p	GATAD2B
hsa-miR-5096	GATAD2B
hsa-miR-31-5p	GATAD2B
hsa-miR-148a-3p	GATAD2B
hsa-miR-1275	GATAD2B
hsa-miR-4472	GATAD2B
hsa-miR-155-5p	GATAD2B
hsa-miR-5096	GATC
hsa-miR-22-3p	GATM
hsa-miR-98-5p	GATM
hsa-miR-5787	GBA2
hsa-miR-4505	GBA2
hsa-miR-101-3p	GCC2
hsa-miR-5787	GCKR
hsa-miR-4505	GCKR
hsa-miR-3620-5p	GCKR
hsa-miR-30e-5p	GCLC
hsa-miR-155-5p	GCNT1
hsa-miR-181a-5p	GCNT2
hsa-miR-30e-5p	GCNT2
hsa-miR-181c-5p	GCNT2
hsa-miR-6791-5p	GDAP1L1
hsa-miR-98-5p	GDAP2
hsa-miR-101-3p	GDE1
hsa-miR-98-5p	GDF6
hsa-miR-148b-3p	GDF6
hsa-miR-148a-3p	GDF6
hsa-miR-6791-5p	GDF6
hsa-miR-1275	GDF6
hsa-miR-4447	GDI1
hsa-miR-6779-5p	GDI1
hsa-miR-5096	GEMIN8
hsa-miR-181a-5p	GFPT1
hsa-miR-181c-5p	GFPT1
hsa-miR-6779-5p	GFRA2
hsa-miR-5787	GGA1
hsa-miR-4505	GGA1
hsa-miR-4492	GGA1
hsa-miR-15a-5p	GGA3
hsa-miR-5787	GGT7
hsa-miR-6791-5p	GGT7
hsa-miR-4505	GGT7
hsa-miR-6803-5p	GIGYF1
hsa-miR-6791-5p	GIGYF1
hsa-miR-4492	GIGYF1
hsa-miR-30c-1-3p	GIGYF1
hsa-miR-30e-5p	GIGYF2
hsa-miR-22-3p	GIGYF2
hsa-miR-194-5p	GIPC1
hsa-miR-4492	GIPC3
hsa-miR-6803-5p	GIT1
hsa-miR-1275	GIT1
hsa-miR-4492	GIT1
hsa-miR-30e-5p	GJA1
hsa-miR-101-3p	GJA1
hsa-miR-550a-5p	GJC1
hsa-miR-423-5p	GK5
hsa-miR-30e-5p	GLCCI1
hsa-miR-30e-5p	GLDC
hsa-miR-140-3p	GLG1
hsa-miR-6791-5p	GLI1
hsa-miR-30d-5p	GLI2
hsa-miR-22-3p	GLIPR2
hsa-miR-423-5p	GLIPR2
hsa-miR-7150	GLIS1
hsa-miR-423-5p	GLP1R
hsa-miR-1275	GLP1R
hsa-miR-181a-5p	GLS
hsa-miR-15a-5p	GLS2
hsa-miR-15a-5p	GLT1D1
hsa-miR-6126	GLT25D1
hsa-miR-4301	GLUL
hsa-miR-22-3p	GM2A
hsa-miR-5096	GMFB
hsa-miR-6779-5p	GNA12
hsa-miR-30e-5p	GNAI2
hsa-miR-3607-5p	GNAI2
hsa-miR-3620-5p	GNAI2
hsa-miR-4492	GNAI2
hsa-miR-15a-5p	GNAI3
hsa-miR-98-5p	GNAL
hsa-miR-3620-5p	GNAO1
hsa-miR-550a-5p	GNAO1
hsa-miR-4687-3p	GNAT1
hsa-miR-181a-5p	GNB4
hsa-miR-5096	GNB4
hsa-miR-7641	GNB4
hsa-miR-181c-5p	GNB4
hsa-miR-7150	GNG12
hsa-miR-194-5p	GNG2
hsa-miR-98-5p	GNG5
hsa-miR-30e-5p	GNPDA1
hsa-miR-3609	GNRHR
hsa-miR-1246	GNRHR
hsa-miR-98-5p	GNS
hsa-miR-148b-3p	GNS
hsa-miR-4301	GOLPH3
hsa-miR-6126	GOLPH3L
hsa-miR-98-5p	GOLT1B
hsa-miR-148b-3p	GOLT1B
hsa-miR-148a-3p	GOLT1B
hsa-miR-140-3p	GOPC
hsa-miR-15a-5p	GORASP2
hsa-miR-5787	GOSR2
hsa-miR-181a-5p	GOT2
hsa-miR-194-5p	GOT2
hsa-miR-181c-5p	GOT2
hsa-miR-15a-5p	GPATCH8
hsa-miR-140-3p	GPC3
hsa-miR-3609	GPC4
hsa-miR-6779-5p	GPD1
hsa-miR-22-3p	GPR107
hsa-miR-148b-3p	GPR116
hsa-miR-148a-3p	GPR116
hsa-miR-15a-5p	GPR124
hsa-miR-6791-5p	GPR153
hsa-miR-140-3p	GPR158
hsa-miR-5787	GPR173
hsa-miR-6779-5p	GPR173
hsa-miR-4505	GPR173
hsa-miR-98-5p	GPR26
hsa-miR-1246	GPR26
hsa-miR-6779-5p	GPR39
hsa-miR-15a-5p	GPR63
hsa-miR-5096	GPR83
hsa-miR-6779-5p	GPR83
hsa-miR-30c-1-3p	GPX8
hsa-miR-15a-5p	GRB10
hsa-miR-3609	GRB2
hsa-miR-3620-5p	GREB1
hsa-miR-6073	GREM1
hsa-miR-30d-5p	GRHL2
hsa-miR-194-5p	GRHL3
hsa-miR-1246	GRIA1
hsa-miR-181a-5p	GRIA2
hsa-miR-181c-5p	GRIA2
hsa-miR-5096	GRIK2
hsa-miR-5787	GRIK3
hsa-miR-423-5p	GRIK3
hsa-miR-4638-5p	GRIK3
hsa-miR-4472	GRIK3
hsa-miR-6791-5p	GRIK5
hsa-miR-1273g-3p	GRIN1
hsa-miR-4734	GRIN1
hsa-miR-1275	GRIN1
hsa-miR-4687-3p	GRIN2A
hsa-miR-155-5p	GRIN2A
hsa-miR-4508	GRIN2D
hsa-miR-7150	GRIP2
hsa-miR-181a-5p	GRM1
hsa-miR-4472	GRM1
hsa-miR-181c-5p	GRM1
hsa-miR-140-3p	GRM2
hsa-miR-4492	GRM2
hsa-miR-181a-5p	GRM5
hsa-miR-181c-5p	GRM5
hsa-miR-181a-5p	GRM7
hsa-miR-98-5p	GRPEL2
hsa-miR-6073	GRPEL2
hsa-miR-30c-1-3p	GRPEL2
hsa-miR-101-3p	GRSF1
hsa-miR-3609	GSK3B
hsa-miR-3607-5p	GTDC1
hsa-miR-7150	GTDC1
hsa-miR-361-5p	GTF2E1
hsa-miR-5787	GTPBP1
hsa-miR-4505	GTPBP1
hsa-miR-4492	GTPBP1
hsa-miR-3609	GUCY1A3
hsa-miR-98-5p	GYG2
hsa-miR-101-3p	H2AFV
hsa-miR-22-3p	H3F3B
hsa-miR-30e-5p	H6PD
hsa-miR-30d-5p	H6PD
hsa-miR-98-5p	HABP4
hsa-miR-98-5p	HAND1
hsa-miR-181a-5p	HAND2
hsa-miR-181a-5p	HAPLN1
hsa-miR-148b-3p	HAS3
hsa-miR-148a-3p	HAS3
hsa-miR-181a-5p	HAUS3
hsa-miR-181c-5p	HAUS3
hsa-miR-7150	HBEGF
hsa-miR-140-3p	HBP1
hsa-miR-30e-5p	HBS1L
hsa-miR-3607-5p	HBS1L
hsa-miR-181a-5p	HCN2
hsa-miR-181c-5p	HCN2
hsa-miR-7150	HCN3
hsa-miR-4505	HCN4
hsa-miR-3620-5p	HCN4
hsa-miR-4492	HCN4
hsa-miR-22-3p	HDAC4
hsa-miR-140-3p	HDAC4
hsa-miR-5787	HDAC5
hsa-miR-22-3p	HDAC8
hsa-miR-4472	HDAC9
hsa-miR-423-5p	HDDC3
hsa-miR-148b-3p	HDGF
hsa-miR-148a-3p	HDGF
hsa-miR-98-5p	HDLBP
hsa-miR-425-5p	HDLBP
hsa-miR-98-5p	HDX
hsa-miR-6126	HDX
hsa-miR-1273g-3p	HEATR4
hsa-miR-6791-5p	HECTD3
hsa-miR-101-3p	HEG1
hsa-miR-30e-5p	HELZ
hsa-miR-15a-5p	HELZ
hsa-miR-30d-5p	HELZ
hsa-miR-101-3p	HELZ
hsa-miR-98-5p	HELZ
hsa-miR-3609	HELZ
hsa-miR-5787	HEMK1
hsa-miR-4505	HEMK1
hsa-miR-4492	HEMK1
hsa-miR-6779-5p	HEPACAM
hsa-miR-181a-5p	HEPHL1
hsa-miR-361-5p	HERC4
hsa-miR-31-5p	HERPUD2
hsa-miR-3620-5p	HES2
hsa-miR-4492	HES2
hsa-miR-6791-5p	HGS
hsa-miR-148b-3p	HHEX
hsa-miR-148a-3p	HHEX
hsa-miR-30d-5p	HHIPL1
hsa-miR-3620-5p	HHLA2
hsa-miR-140-3p	HIC1
hsa-miR-6791-5p	HIC1
hsa-miR-181a-5p	HIC2
hsa-miR-423-5p	HIC2
hsa-miR-98-5p	HIC2
hsa-miR-31-5p	HIF1AN
hsa-miR-98-5p	HIF1AN
hsa-miR-148b-3p	HIF1AN
hsa-miR-148a-3p	HIF1AN
hsa-miR-3620-5p	HIF1AN
hsa-miR-7150	HIF1AN
hsa-miR-423-5p	HIF3A
hsa-miR-550a-5p	HIF3A
hsa-miR-15a-5p	HIGD1A
hsa-miR-4505	HIP1
hsa-miR-30c-1-3p	HIP1
hsa-miR-30e-5p	HIPK2
hsa-miR-5096	HIPK2
hsa-miR-15a-5p	HIPK2
hsa-miR-1246	HIPK2
hsa-miR-30e-5p	HLF
hsa-miR-148b-3p	HLF
hsa-miR-148a-3p	HLF
hsa-miR-181a-5p	HMBS
hsa-miR-30c-1-3p	HMG20A
hsa-miR-15a-5p	HMGA1
hsa-miR-6803-5p	HMGA1
hsa-miR-6791-5p	HMGA1
hsa-miR-1275	HMGA1
hsa-miR-15a-5p	HMGA2
hsa-miR-98-5p	HMGA2
hsa-miR-181a-5p	HMGB2
hsa-miR-181c-5p	HMGB2
hsa-miR-148a-3p	HMGB3
hsa-miR-7150	HMGCL
hsa-miR-5096	HMGN2
hsa-miR-5787	HMP19
hsa-miR-4505	HMP19
hsa-miR-30c-1-3p	HNF1B
hsa-miR-5787	HNF4A
hsa-miR-6791-5p	HNMT
hsa-miR-15a-5p	HNRNPA2B1
hsa-miR-30e-5p	HNRNPA3
hsa-miR-30d-5p	HNRNPA3
hsa-miR-425-5p	HNRNPD
hsa-miR-30c-1-3p	HNRNPL
hsa-miR-6779-5p	HNRNPU
hsa-miR-30c-1-3p	HNRNPU
hsa-miR-423-5p	HNRNPUL1
hsa-miR-6791-5p	HNRNPUL1
hsa-miR-140-3p	HNRPDL
hsa-miR-148b-3p	HOMER1
hsa-miR-148a-3p	HOMER1
hsa-miR-98-5p	HOOK1
hsa-miR-155-5p	HOOK1
hsa-miR-30d-5p	HOOK3
hsa-miR-15a-5p	HOXA10
hsa-miR-181c-5p	HOXA11
hsa-miR-550a-5p	HOXB13
hsa-miR-140-3p	HOXB5
hsa-miR-423-5p	HOXC10
hsa-miR-15a-5p	HOXC13
hsa-miR-98-5p	HOXD1
hsa-miR-5787	HPCAL4
hsa-miR-6779-5p	HPCAL4
hsa-miR-4505	HPCAL4
hsa-miR-15a-5p	HPSE2
hsa-miR-550a-5p	HRASLS5
hsa-miR-181a-5p	HS2ST1
hsa-miR-140-3p	HS2ST1
hsa-miR-98-5p	HS2ST1
hsa-miR-181c-5p	HS2ST1
hsa-miR-7150	HS2ST1
hsa-miR-194-5p	HS3ST2
hsa-miR-140-3p	HS6ST2
hsa-miR-3609	HS6ST3
hsa-miR-5787	HSPA12A
hsa-miR-5787	HSPA12B
hsa-miR-4505	HSPA12B
hsa-miR-101-3p	HSPA13
hsa-miR-5787	HSPB6
hsa-miR-4505	HSPB6
hsa-miR-5787	HSPB7
hsa-miR-30c-1-3p	HSPBP1
hsa-miR-15a-5p	HSPG2
hsa-miR-5787	HSPG2
hsa-miR-140-3p	HSPG2
hsa-miR-4505	HSPG2
hsa-miR-98-5p	HTR1E
hsa-miR-15a-5p	HTR2A
hsa-miR-15a-5p	HTR4
hsa-miR-98-5p	HTR4
hsa-miR-15a-5p	HTRA2
hsa-miR-101-3p	HTRA3
hsa-miR-22-3p	HUNK
hsa-miR-181a-5p	HYOU1
hsa-miR-140-3p	HYOU1
hsa-miR-181c-5p	HYOU1
hsa-miR-7150	ICA1
hsa-miR-30e-5p	ICK
[truncated: 3,334 more rows]

## Sheet: list of targeted genes
Gene symbol
AAK1
AASS
AATK
ABAT
ABCA4
ABCB9
ABCC10
ABCC5
ABCF2
ABCG4
ABCG8
ABHD14B
ABHD15
ABHD2
ABHD4
ABI1
ABI2
ABL2
ABLIM3
ABR
ABTB2
ACACA
ACAP2
ACCN2
ACER2
ACP2
ACRBP
ACSL1
ACSL4
ACSL6
ACTA1
ACVR1
ACVR1B
ACVR1C
ACVR2A
ACVR2B
ACVRL1
ADAM11
ADAM12
ADAM17
ADAM19
ADAMTS10
ADAMTS18
ADAMTS19
ADAMTS4
ADAMTS5
ADAMTS6
ADAMTS8
ADAMTSL1
ADCK2
ADCY1
ADCY2
ADCY5
ADCY6
ADCY9
ADCYAP1
ADNP2
ADPRH
ADRA1D
ADRBK1
ADRBK2
AEBP2
AFF1
AFF3
AFF4
AFTPH
AGAP2
AGAP3
AGBL5
AGFG1
AGFG2
AGPAT4
AGPAT6
AHCTF1
AHCYL2
AHDC1
AK1
AK2
AKAP1
AKAP11
AKAP12
AKAP13
AKAP5
AKAP6
AKT2
AKT3
ALCAM
ALDH1A3
ALDH1L2
ALDH7A1
ALG9
ALKBH7
ALPK3
ALX4
AMMECR1L
AMOT
AMOTL1
AMOTL2
AMPH
ANGEL1
ANGEL2
ANK1
ANK2
ANK3
ANKFY1
ANKIB1
ANKRD11
ANKRD13B
ANKRD17
ANKRD28
ANKRD34A
ANKRD40
ANKRD46
ANKRD49
ANKRD5
ANKRD52
ANKS1A
ANO3
ANO4
ANO6
ANTXR1
AP1S2
AP3S1
AP3S2
AP4E1
APBA1
APBA2
APBB2
APLN
APLP2
APOBEC2
APOOL
APPBP2
APPL1
AQP1
AQP11
AQP4
ARC
ARCN1
ARF4
ARFGAP2
ARFIP2
ARGLU1
ARHGAP17
ARHGAP26
ARHGAP28
ARHGAP5
ARHGDIA
ARHGEF12
ARHGEF15
ARHGEF17
ARHGEF2
ARHGEF3
ARHGEF4
ARHGEF6
ARID1A
ARID1B
ARID2
ARID3B
ARIH2
ARL10
ARL2
ARL4A
ARL4D
ARL5A
ARL6IP1
ARL6IP5
ARL8A
ARL8B
ARMC8
ARMCX6
ARNT
ARNT2
ARPC5
ARPP19
ARRB2
ARRDC3
ARRDC4
ASAH1
ASAP1
ASB11
ASB3
ASB6
ASPH
ASTN1
ATAD2B
ATF1
ATF7
ATG2B
ATG4D
ATG9A
ATL2
ATL3
ATOH8
ATP11A
ATP11C
ATP1B2
ATP1B4
ATP2A2
ATP2B1
ATP2B2
ATP2B3
ATP2B4
ATP2C1
ATP6V1B2
ATP6V1C1
ATP6V1G1
ATP7A
ATP8A1
ATP8B1
ATP8B2
ATP8B4
ATP9A
ATPAF1
ATPBD4
ATRN
ATRNL1
ATRX
ATXN1
ATXN2
ATXN2L
ATXN3
ATXN7
ATXN7L2
ATXN7L3
AVEN
AXIN1
AXIN2
B3GNT7
B4GALNT1
B4GALT1
B4GALT2
B4GALT6
BACE1
BACH1
BACH2
BAHCC1
BAHD1
BAI2
BAI3
BAIAP2
BAIAP2L1
BAP1
BARX2
BATF3
BAZ1B
BAZ2A
BAZ2B
BBC3
BCAM
BCAT1
BCAT2
BCL2
BCL2L11
BCL2L2
BCL6B
BCL7A
BCL7B
BCL9
BCL9L
BCLAF1
BCORL1
BEND4
BEND7
BFAR
BHLHE41
BICD2
BIN1
BIRC6
BMF
BMP3
BMPR2
BNC2
BOLL
BPTF
BRD2
BRD3
BRD4
BRWD1
BRWD3
BSDC1
BSN
BTAF1
BTBD11
BTBD3
BTBD7
BTBD9
BTG2
BTLA
BTRC
BVES
BZW1
C1QTNF7
C2
C2CD2L
CA5B
CAB39
CABLES1
CABP7
CACNA1B
CACNA1C
CACNA1E
CACNA2D2
CACNB1
CACNB2
CACNB3
CADM1
CADM3
CADM4
CADPS
CALCR
CALM1
CALM2
CALM3
CALN1
CAMK2A
CAMK2G
CAMKK1
CAMKK2
CAMKV
CAMSAP1
CAMSAP1L1
CAMTA1
CAMTA2
CAND1
CANT1
CAPN1
CAPN6
CAPRIN1
CAPRIN2
CAPZA2
CARD11
CARHSP1
CARM1
CASC3
CASK
CASKIN2
CASP10
CASP2
CASZ1
CAV1
CAV3
CBFA2T2
CBFA2T3
CBFB
CBL
CBLL1
CBLN3
CBX1
CBX5
CBX6
CBX7
CCDC113
CCDC117
CCDC126
CCDC157
CCDC19
CCDC28A
CCDC47
CCDC50
CCDC6
CCDC64
CCDC68
CCDC69
CCDC71
CCDC76
CCDC85C
CCDC88A
CCDC88B
CCDC88C
CCDC92
CCDC93
CCDC97
CCKBR
CCL22
CCND1
CCND2
CCNE1
CCNG1
CCNJ
CCNJL
CCNK
CCNT2
CCR7
CCT6A
CD109
CD164
CD200R1
CD274
CD28
CD4
CDC14B
CDC27
CDC34
CDC37L1
CDC42
CDC42BPA
CDC42EP2
CDC42SE1
CDC73
CDCA4
CDCP1
CDH11
CDH24
CDH5
CDK5R1
CDK6
CDK8
CDKN1A
CDKN2AIP
CDON
CDV3
CDX1
CECR6
CELSR1
CELSR2
CELSR3
CENPO
CENPV
CEP350
CEP68
CFL1
CFL2
CHAC1
CHD1
CHD2
CHD5
CHD6
CHD7
CHD9
CHEK1
CHGA
CHIC1
CHL1
CHMP7
CHRD
CHRM1
CHRNB2
CHST1
CHST3
CHTF8
CIB1
CIC
CIITA
CISD3
CKM
CLCC1
CLCF1
CLCN5
CLCN6
CLCNKA
CLCNKB
CLDN12
CLDN19
CLDN2
CLDN7
CLEC2L
CLIC4
CLIP3
CLLU1
CLMN
CLN8
CLOCK
CLPB
CLTB
CMIP
CMTM3
CMTM6
CNBP
CNIH2
CNNM1
CNNM3
CNOT10
CNOT2
CNOT4
CNOT6
CNOT6L
CNP
CNR1
CNTFR
CNTLN
CNTN2
CNTN4
COG5
COL10A1
COL11A2
COL12A1
COL14A1
COL15A1
COL16A1
COL1A1
COL21A1
COL23A1
COL24A1
COL25A1
COL4A2
COL4A3BP
COL5A1
COL9A3
COMMD10
COPS2
COPS7B
CORO1C
CORO2A
CORO2B
CORO7
CPD
CPEB1
CPEB2
CPEB4
CPLX2
CPLX3
CPM
CPNE5
CPOX
CPSF6
CPT1A
CRAT
CRB2
CRCT1
CREB1
CREBL2
CRELD1
CRISPLD2
CRKL
CRLF3
CRTAP
CRTC1
CRTC2
CRY2
CSDA
CSDE1
CSF1
CSF1R
CSK
CSNK1G1
CSRNP2
CSRP2
CTDSP1
CTDSP2
CTDSPL
CTHRC1
CTNNBIP1
CTNND1
CTNS
CTPS2
CTSA
CTTNBP2NL
CUEDC1
CUL2
CUL3
CUL4B
CUL5
CUX1
CUX2
CX3CL1
CXCL12
CXCR5
CYB561D1
CYB5B
CYB5RL
CYBASC3
CYP19A1
CYP26B1
CYP27B1
CYP46A1
CYR61
CYTH3
DAAM2
DAB2IP
DAG1
DAGLA
DAPK1
DAPK2
DAZAP2
DBNDD1
DBP
DCBLD2
DCDC2B
DCLK1
DCN
DCP1A
DCP2
DCTD
DCTN4
DCTN5
DCUN1D3
DCUN1D4
DCX
DDAH1
DDHD2
DDIT4
DDN
DDX19A
DDX19B
DDX23
DDX3X
DDX3Y
DEDD
DEF8
DEM1
DENND1A
DENND4A
DENR
DEPDC1B
DERL1
DET1
DEXI
DFNB31
DGCR2
DGCR8
DGKA
DGKE
DGKG
DGKZ
DHCR24
DHDDS
DHRS13
DHTKD1
DHX40
DHX57
DHX8
DICER1
DIO2
DIP2A
DIP2B
DIP2C
DIS3
DLG3
DLG5
DLGAP1
DLGAP2
DLGAP3
DLGAP4
DLST
DLX2
DMBX1
DMPK
DMRTA2
DMTF1
DMWD
DMXL1
DNAJA4
DNAJB12
DNAJB4
DNAJB5
DNAJC16
DND1
DNM2
DNM3
DNMT3A
DNMT3B
DOCK1
DOCK3
DOCK6
DOK4
DOLPP1
DPF2
DPF3
DPM2
DPP10
DPP6
DPYSL5
DRP2
DSCR3
DSEL
DSTYK
DTNA
DTX3
DTX3L
DTX4
DUSP16
DUSP4
DUSP8
DUSP9
DVL3
DYNC1LI2
DYNLL2
DYRK1A
DYRK2
E2F1
E2F2
E2F3
E2F6
E2F7
EBF1
EBF3
ECT2L
EDA
EDC3
EDEM1
EDEM3
EDNRA
EED
EEF2K
EFHD2
EFNB3
EFTUD2
EGLN2
EGR1
EGR3
EHD2
EHD3
EI24
EIF1AD
EIF2C1
EIF2C3
EIF2C4
EIF2S2
EIF3A
EIF4A2
EIF4B
EIF4E
EIF4E3
EIF4EBP2
EIF4G1
EIF4G3
EIF5
EIF5A2
ELAVL2
ELAVL3
ELAVL4
ELF2
ELF5
ELFN2
ELK1
ELL
ELL2
ELMOD2
ELN
ELOVL5
ELOVL7
EME1
EMILIN3
EML4
EML6
EMP1
EMP2
EMX1
EN2
ENAH
ENC1
ENG
ENGASE
ENOSF1
ENSA
ENTPD6
ENTPD7
ENY2
EP300
EPB41
EPB41L3
EPB41L4B
EPB41L5
EPDR1
EPHA1
EPHA10
EPHA4
EPHA5
EPHA8
EPHB2
EPHB3
EPN2
EPS15
EPS8L1
ERBB2IP
ERBB3
ERBB4
ERC1
ERCC4
ERF
ERG
ERGIC2
ERI1
ERI3
ERLIN2
ERMP1
ERP44
ERRFI1
ESCO1
ESM1
ESPL1
ESPN
ESR1
ESRP2
ETF1
ETNK1
ETS1
ETS2
ETV1
ETV6
EXOC3L2
EXOSC3
EXTL3
EYA1
EYA3
EYA4
EZH1
EZH2
F3
FA2H
FADS6
FAF2
FAHD1
FAIM2
FAM102A
FAM103A1
FAM104A
FAM104B
FAM105B
FAM108B1
FAM109A
FAM117A
FAM117B
FAM118A
FAM120C
FAM122B
FAM123B
FAM123C
FAM125B
FAM126B
FAM129A
FAM133B
FAM134B
FAM134C
FAM135A
FAM135B
FAM13A
FAM155B
FAM160B1
FAM166B
FAM168A
FAM171A1
FAM172A
FAM178A
FAM179B
FAM21C
FAM46B
FAM49A
FAM53B
FAM53C
FAM57B
FAM60A
FAM63B
FAM65A
FAM70A
FAM73A
FAM73B
FAM78A
FAM84B
FAS
FASLG
FAT2
FAT4
FBN1
FBN2
FBN3
FBRS
FBRSL1
FBXL16
FBXL19
FBXL20
FBXL3
FBXL7
FBXO10
FBXO11
FBXO21
FBXO28
FBXO31
FBXO33
FBXO34
FBXO41
FBXO44
FBXO45
FBXO46
FBXW2
FBXW7
FCHSD1
FEM1C
FGD1
FGD4
FGD6
FGF11
FGF17
FGF7
FGF9
FGFR1
FGFR1OP2
FGFR3
FHDC1
FKBP1A
FKBP5
FLJ25363
FLNC
FLOT2
FLRT2
FLRT3
FLT1
FLT3
FLVCR1
FMN1
FMNL2
FMNL3
FMO1
FMR1
FNBP4
FNDC3A
FNDC3B
FNIP1
FNIP2
FNTA
FOS
FOSB
FOSL2
FOXA2
FOXJ3
FOXK1
FOXK2
FOXN3
FOXO1
FOXO3
FOXO4
FOXP1
FOXP2
FOXP3
FOXP4
FRAS1
FREM2
FRMD4A
FRMD5
FRMPD4
FRS2
FRYL
FSCN3
FSTL4
FTL
FUBP1
FURIN
FUT10
FUT9
FXC1
FXN
FXR1
FXR2
FZD3
FZD4
G2E3
G3BP2
GAB1
GAB2
GABBR1
GABBR2
GABRA1
GABRA3
GABRA4
GABRB2
GAD2
GALE
GALNT1
GALNT10
GALNT2
GALNT3
GALNTL1
GAN
GAPVD1
GAS7
GATA4
GATAD2A
GATAD2B
GATC
GATM
GBA2
GCC2
GCKR
GCLC
GCNT1
GCNT2
GDAP1L1
GDAP2
GDE1
GDF6
GDI1
GEMIN8
GFPT1
GFRA2
GGA1
GGA3
GGT7
GIGYF1
GIGYF2
GIPC1
GIPC3
GIT1
GJA1
GJC1
GK5
GLCCI1
GLDC
GLG1
GLI1
GLI2
GLIPR2
GLIS1
GLP1R
GLS
GLS2
GLT1D1
GLT25D1
GLUL
GM2A
GMFB
GNA12
GNAI2
GNAI3
GNAL
GNAO1
GNAT1
GNB4
GNG12
GNG2
GNG5
GNPDA1
GNRHR
GNS
GOLPH3
GOLPH3L
GOLT1B
GOPC
GORASP2
GOSR2
GOT2
GPATCH8
GPC3
GPC4
GPD1
GPR107
GPR116
GPR124
GPR153
GPR158
GPR173
GPR26
GPR39
GPR63
GPR83
GPX8
GRB10
GRB2
GREB1
GREM1
GRHL2
GRHL3
GRIA1
GRIA2
GRIK2
GRIK3
GRIK5
GRIN1
GRIN2A
GRIN2D
GRIP2
GRM1
GRM2
GRM5
GRM7
GRPEL2
GRSF1
GSK3B
GTDC1
GTF2E1
GTPBP1
GUCY1A3
GYG2
H2AFV
H3F3B
H6PD
HABP4
HAND1
HAND2
HAPLN1
HAS3
HAUS3
HBEGF
HBP1
HBS1L
HCN2
HCN3
HCN4
HDAC4
HDAC5
HDAC8
HDAC9
HDDC3
HDGF
HDLBP
HDX
HEATR4
HECTD3
HEG1
HELZ
HEMK1
HEPACAM
HEPHL1
HERC4
HERPUD2
HES2
HGS
HHEX
HHIPL1
HHLA2
HIC1
HIC2
HIF1AN
HIF3A
HIGD1A
HIP1
HIPK2
HLF
HMBS
HMG20A
HMGA1
HMGA2
HMGB2
HMGB3
HMGCL
HMGN2
HMP19
HNF1B
HNF4A
HNMT
HNRNPA2B1
HNRNPA3
HNRNPD
HNRNPL
HNRNPU
HNRNPUL1
HNRPDL
HOMER1
HOOK1
HOOK3
HOXA10
HOXA11
HOXB13
HOXB5
HOXC10
HOXC13
HOXD1
HPCAL4
HPSE2
HRASLS5
HS2ST1
HS3ST2
HS6ST2
HS6ST3
HSPA12A
HSPA12B
HSPA13
HSPB6
HSPB7
HSPBP1
HSPG2
HTR1E
HTR2A
HTR4
HTRA2
HTRA3
HUNK
HYOU1
ICA1
ICK
ICMT
ICOSLG
IDE
IDH1
IDS
IFNAR2
IFRD1
IFRD2
IGDCC3
IGDCC4
IGF1
IGF1R
IGF2BP1
IGF2BP2
IGF2BP3
IGFBP5
IGLON5
IGSF1
IGSF11
IKBKB
IKZF1
IKZF2
IKZF4
IL10RA
IL13
IL13RA1
IL15
IL2
IL20RA
IL28RA
IL2RB
IL34
ILDR2
ILK
INHBE
INO80
INO80D
INO80E
INPP4A
INPP5A
INPP5K
INSR
INTS2
INTS6
IP6K1
IP6K3
IPO7
IPO8
IPO9
IPPK
IQGAP1
IQSEC1
IQSEC2
IRF1
IRF2BP2
IRF4
IRGQ
IRS1
IRS2
IRX6
ISL1
ISLR
ISM1
ISOC1
ISOC2
ITFG3
ITGA10
ITGA11
ITGA3
ITGA4
ITGA5
ITGB8
ITGBL1
ITIH5
ITSN2
IVD
JAG1
JAK2
JARID2
JDP2
JHDM1D
JMJD1C
JMJD6
JMY
JOSD1
JPH1
JPH2
JPH4
JUB
KALRN
KANK1
KAT2A
KATNAL1
KATNB1
KBTBD2
KBTBD8
KCMF1
KCNA1
KCNAB2
KCNC1
KCNC4
KCND1
KCNE1
KCNE4
KCNH1
KCNIP1
KCNIP3
KCNK10
KCNQ1
KCTD10
KCTD15
KCTD21
KCTD5
KDELC2
KDELR2
KDM3B
KDM5A
KDM5B
KDM6A
KDM6B
KHDRBS2
KHDRBS3
KIAA0100
KIAA0182
KIAA0195
KIAA0226
KIAA0247
KIAA0284
KIAA0317
KIAA0355
KIAA0528
KIAA0556
KIAA0664
KIAA0907
KIAA1024
KIAA1045
KIAA1147
KIAA1210
KIAA1239
KIAA1267
KIAA1274
KIAA1370
KIAA1432
KIAA1462
KIAA1522
KIAA1549
KIAA1715
KIAA1755
KIAA1804
KIAA1841
KIAA1949
KIAA2018
KIAA2022
KIF16B
KIF17
KIF1A
KIF1B
KIF2A
KIF3B
KIF3C
KIF5A
KIF5B
KIRREL3
KLC2
KLF12
KLF13
KLF3
KLF4
KLF5
KLF9
KLHDC10
KLHDC5
KLHDC8B
KLHL18
KLHL25
KLHL28
KLHL3
KLK10
KLK9
KPNA1
KPNA3
KPNA4
KPNA6
KPNB1
KRAS
KREMEN1
KRT80
KSR1
KSR2
KY
L1CAM
LAD1
LAMA3
LAMA4
LAMC1
LAMP1
LAMP2
LAPTM5
LARP1
LAT
LATS2
LBH
LBR
LCA5
LCNL1
LCOR
LCORL
LDB1
LDLR
LDLRAD2
LDLRAD3
LEPROTL1
LGALS8
LHB
LHFPL2
LHFPL3
LHFPL4
LHX3
LHX4
LHX6
LIF
LIFR
LIMCH1
LIMD2
LIMK2
LIN28B
LIN7C
LIPH
LITAF
LMAN2L
LMBRD2
LMF2
LMO3
LMOD1
LMTK2
LMX1A
LMX1B
LOC221710
LONRF2
LOXL1
LPAR5
LPCAT3
LPGAT1
LPHN1
LPHN2
LPIN2
LPPR2
LPPR4
LRCH2
LRCH4
LRFN2
LRIG1
LRIG2
LRIG3
LRP1
LRP3
LRP4
LRP6
LRP8
LRRC15
LRRC59
LRRC8A
LRRC8E
LRRN1
LRRN2
LRTOMT
LSM11
LSM12
LSS
LTB4R
LUZP1
LYNX1
LYPD3
LYPD5
LYPD6
LYPLA2
LYRM2
LYRM5
LYSMD2
LYSMD3
LZTS2
M6PR
MADD
MAFG
MAFK
MAG
MAGI1
MAGI2
MAK
MAML1
MAMSTR
MAP1A
MAP1B
MAP1LC3A
MAP2K1
MAP2K4
MAP2K7
MAP3K1
MAP3K10
MAP3K11
MAP3K12
MAP3K14
MAP3K3
MAP3K4
MAP3K5
MAP3K9
MAP4
MAP4K3
MAP4K4
MAP4K5
MAP6
MAP6D1
MAP7
MAP7D2
MAP7D3
MAPK1
MAPK14
MAPK1IP1L
MAPK4
MAPKAP1
MAPKBP1
MAPRE2
MAPRE3
MARCH3
MARCH4
MARCH6
MARCKS
MARCKSL1
MARK1
MASP1
MAVS
MAX
MAZ
MBD1
MBD6
MBNL1
MBOAT1
MBOAT2
MC2R
MCHR1
MCL1
MCOLN2
MCTP2
MCTS1
MDFI
MDGA1
MDGA2
MDM4
MECP2
MED1
MED12L
MED13
MED28
MED29
MEF2A
MEF2C
MEF2D
MEGF10
MEGF8
MEIS2
MEMO1
MEOX2
METAP1
METAP2
MEX3A
MEX3B
MFAP3
MFAP3L
MFN2
MFNG
MFSD4
MFSD5
MFSD8
MGAT3
MGAT4A
MGAT4B
MGLL
MIB1
MICAL3
MID1
MID2
MIDN
MIER3
MINK1
MIP
MIPOL1
MITF
MKL1
MKL2
MKLN1
MKNK1
MKRN1
MLF1
MLH3
MLL2
MLL3
MLL4
MLLT10
MLLT11
MLLT4
MLLT6
MLXIP
MMAB
MMD
MMP13
MMP14
MMP15
MMP17
MMP19
MMP2
MMRN2
MN1
MNT
MOBKL2B
MOCS1
MOCS2
MON1A
MON2
MOSPD1
MPDU1
MPDZ
MPP5
MPP7
MPPED2
MPZ
MRAP2
MRAS
MRPL35
MRPS10
MRPS16
MRPS25
MRS2
MRVI1
MSH3
MSI1
MSI2
MSL2
MSN
MSRB3
MTCH1
MTDH
MTF1
MTHFR
MTMR1
MTMR10
MTMR12
MTMR2
MTMR3
MTMR9
MTUS1
MTX3
MURC
MUS81
MXD1
MXD4
MXRA7
MYB
MYBL1
MYCL1
MYCN
MYLIP
MYLK
MYLK2
MYLK4
MYO10
MYO15A
MYO18A
MYO1C
MYO1D
MYO1F
MYO5A
MYRIP
MYT1
N4BP1
N4BP2L1
N4BP3
NACC1
NADK
NAP1L1
NAP1L3
NAPG
NARG2
NASP
NAT14
NAT15
NAT8L
NAT9
NAV1
NAV3
NBEA
NBEAL2
NCAN
NCDN
NCOA1
NCOA2
NCOA3
NCOA5
NCOA7
NCOR1
NCOR2
NCSTN
NDE1
NDEL1
NDST1
NDST3
NEBL
NECAB3
NEDD4
NEFL
NEK3
NEO1
NET1
NEURL1B
NEUROD1
NEUROD2
NF2
NFAM1
NFASC
NFAT5
NFATC4
NFIA
NFIB
NFIX
NFRKB
NFYA
NFYB
NFYC
NGFR
NHLH2
NHLRC2
NHLRC3
NHP2
NHS
NIPA1
NIPAL4
NIPSNAP3B
NKD1
NKIRAS2
NLGN2
NLGN3
NLK
NLRC5
NME4
NMNAT2
NMT2
NNAT
NOL4
NOL6
NOLC1
NOS1AP
NOTCH2
NOVA1
NOVA2
NPAS3
NPEPL1
NPHP3
NPLOC4
NPNT
NPTN
NPTX1
NR1D1
NR1D2
NR1I2
NR2C2
NR2F1
NR2F2
NR3C1
NR4A3
NR5A1
NR5A2
NR6A1
NRAS
NRF1
NRG1
NRG3
NRK
NRN1
NRP1
NRP2
NRSN2
NSD1
NSF
NSFL1C
NSUN5
NT5DC3
NTN1
NTNG1
NTRK2
NTRK3
NUAK1
NUCB1
NUDCD3
NUDT12
NUDT21
NUDT4
NUFIP2
NUMB
NUMBL
NUP188
NUP50
NUP98
NUS1
NXF1
NXT2
OBFC1
ODF1
ODZ2
ODZ3
OGT
OLA1
OLFM4
OLFML2A
ONECUT2
OPA1
OPA3
OPN5
OPRL1
OPRM1
ORAI2
ORAI3
OSBP2
OSBPL10
OSBPL11
OSBPL3
OSBPL5
OSBPL7
OSBPL8
OSMR
OSR1
OTP
OTUD3
OTUD4
OTUD5
OTX1
OXR1
OXSR1
P2RX1
P2RX6
P2RY14
P2RY2
P4HB
P4HTM
PA2G4
PACS1
PACSIN3
PADI1
PADI2
PAFAH1B2
PAG1
PAIP2B
PAK1
PAK2
PAK7
PALM2
PAN3
PANK3
PAPD5
PAPL
PAPOLA
PAPOLG
PAPPA
PAPSS2
PARD6B
PARD6G
PARK2
PARP16
PARP6
PARVA
PAWR
PAX5
PAX6
PAX7
PAX8
PBX1
PBX2
PBX3
PCBP2
PCDH11X
PCDH17
PCDH19
PCDH8
PCDH9
PCDHA1
PCGF2
PCGF3
PCGF5
PCLO
PCM1
PCMT1
PCNXL3
PCSK2
PCYOX1
PCYT1B
PDAP1
PDCD4
PDE11A
PDE1B
PDE4A
PDE4B
PDE4D
PDE7A
PDE7B
PDGFRA
PDIA3
PDIK1L
PDK4
PDLIM2
PDLIM5
PDP2
PDPK1
PDPR
PDRG1
PDS5A
PDSS1
PDXP
PDZD4
PDZD7
PEA15
PEAR1
PEF1
PELI3
PER1
PEX14
PFKFB2
PFKFB4
PGAP1
PGBD5
PGM2L1
PGP
PGR
PGRMC2
PHACTR2
PHACTR4
PHB
PHC1
PHC2
PHC3
PHF13
PHF15
PHF19
PHF20
PHF20L1
PHF21A
PHF8
PHKG2
PHLDB1
PHLDB2
PHOSPHO1
PHOX2B
PHTF2
PI15
PI4K2A
PI4KA
PI4KB
PIGA
PIGG
PIGN
PIK3C2A
PIK3IP1
PIK3R1
PIK3R3
PIM2
PIM3
PIP4K2B
PIP4K2C
PITPNB
PITPNM2
PITPNM3
PITX1
PKD1
PKNOX2
PKP2
PLA2G15
PLA2G5
PLAG1
PLAGL2
PLCB3
PLCD1
PLCD3
PLCG1
PLCXD3
PLD2
PLDN
PLEK
PLEKHA1
PLEKHA5
PLEKHA6
PLEKHA8
PLEKHG2
PLEKHH1
PLEKHH2
PLEKHO2
PLK3
PLOD1
PLP1
PLP2
PLS1
PLUNC
PLXDC1
PLXNA1
PLXNA2
PLXNA3
PLXNA4
PLXNB1
PLXNC1
PMM1
PNKD
PNPLA6
PNRC2
PODXL
POFUT1
POGK
POGZ
POLH
POLR2D
POLR2F
POM121
POM121C
POMT2
POP4
POR
POU2F1
POU2F2
POU4F1
PPAP2A
PPARA
PPARGC1A
PPARGC1B
PPFIA4
[truncated: 1,125 more rows]
